# Supplementary material for: A randomised wait-list controlled trial to evaluate Emotional Freedom Techniques for self-reported cancer-related cognitive impairment in cancer survivors (EMOTICON)
Source: PubMed Central journal article supplement — eClinicalMedicine. 2021 Aug 19;39:101081. doi: 10.1016/j.eclinm.2021.101081 (PMC8385168; doi:10.1016/j.eclinm.2021.101081), 2021-08-19
Supplement: mmc1.pdf [file mmc1.pdf]

A randomized wait-list controlled trial on the use of Emotional Freedom Techniques as an intervention strategy to reduce patient reported cognitive complaints in cancer survivors on behalf of the BSMO - Cancer Survivorship Taskforce

**EMOTICON**

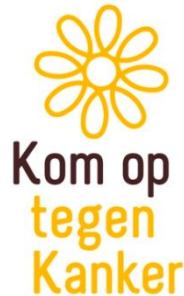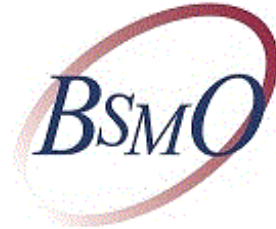

|                                                                                                                                                                                              |                                                                                                                                                                                                                        |
|----------------------------------------------------------------------------------------------------------------------------------------------------------------------------------------------|------------------------------------------------------------------------------------------------------------------------------------------------------------------------------------------------------------------------|
| <p><b>Sponsor Name:</b> Dhr. Jan Deleu<br/>az groeninge<br/>Chief Executive Officer<br/>Pres. Kennedylaan 4<br/>B-8500 Kortrijk<br/>BELGIUM</p> <p><b>Signature:</b></p> <p><b>Date:</b></p> | <p><b>Chief Investigator:</b> Dr. Philip Debruyne<br/>az groeninge<br/>Medical Oncologist<br/>Cancer Center<br/>Campus Loofstraat<br/>Loofstraat 43<br/>8500 Kortrijk</p> <p><b>Signature:</b></p> <p><b>Date:</b></p> |
|----------------------------------------------------------------------------------------------------------------------------------------------------------------------------------------------|------------------------------------------------------------------------------------------------------------------------------------------------------------------------------------------------------------------------|

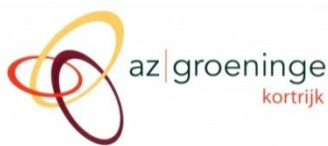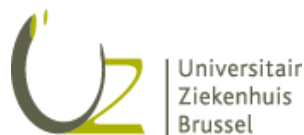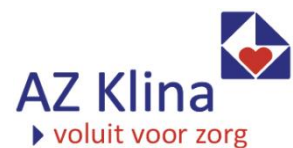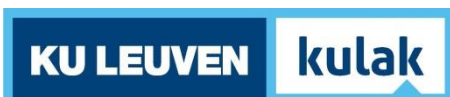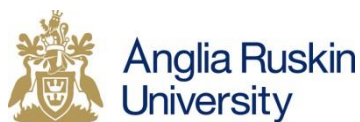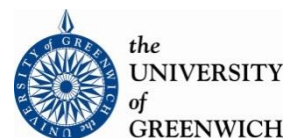

**Table of contents**

|                                                                                                                                     |    |
|-------------------------------------------------------------------------------------------------------------------------------------|----|
| <b>1. Trial Management Group</b> .....                                                                                              | 4  |
| <b>2. Background and rationale</b> .....                                                                                            | 6  |
| <b>3. Trial objectives</b> .....                                                                                                    | 7  |
| <b>4. Study population</b> .....                                                                                                    | 7  |
| 4.1. Inclusion criteria.....                                                                                                        | 7  |
| 4.2. Exclusion criteria.....                                                                                                        | 7  |
| 4.3. Sample size.....                                                                                                               | 8  |
| <b>5. Study design</b> .....                                                                                                        | 8  |
| <b>6. Study procedures</b> .....                                                                                                    | 10 |
| <b>7. Responsibilities</b> .....                                                                                                    | 12 |
| <b>8. Potential risks and benefits</b> .....                                                                                        | 12 |
| <b>9. Safety and reporting</b> .....                                                                                                | 13 |
| <b>10. Patient protection and ethical considerations</b> .....                                                                      | 14 |
| <b>11. Publication policy</b> .....                                                                                                 | 15 |
| <b>12. Financial matters</b> .....                                                                                                  | 15 |
| <b>13. References</b> .....                                                                                                         | 16 |
| <b>Appendix 1. Scoring guidelines for the Charlson Comorbidity Index</b> .....                                                      | 18 |
| <b>Appendix 2. Cognitive Failure Questionnaire (Dutch and French version)</b> .....                                                 | 20 |
| <b>Appendix 3. Distress thermometer and 38-item Problem List (Dutch and French version)</b> .....                                   | 22 |
| <b>Appendix 4. Beck Depression Inventory (Dutch and French version)</b> .....                                                       | 24 |
| <b>Appendix 5. Functional Assessment of Chronic Illness Therapy – Fatigue Subscale (Version 4) (Dutch and French version)</b> ..... | 30 |
| <b>Appendix 6. EORTC QLQ-C30 (Dutch and French version)</b> .....                                                                   | 32 |
| <b>Appendix 7: EQ-5D (Dutch and French version)</b> .....                                                                           | 36 |
| <b>Appendix 8. SAE Report Form</b> .....                                                                                            | 40 |

**List of abbreviations**

|         |                                                               |
|---------|---------------------------------------------------------------|
| AAMET   | Association for the Advancement of Meridian Energy Techniques |
| AE      | Adverse Event                                                 |
| AZ      | algemeen ziekenhuis                                           |
| AZG     | az groeninge                                                  |
| CFQ     | Cognitive Failure Questionnaire                               |
| C-group | Control group                                                 |
| CRF     | Case Report Form                                              |
| CTCAE   | Common Terminology Criteria for Adverse Events                |
| DT      | Distress thermometer                                          |
| EC      | Ethics committee                                              |
| EFT     | Emotional Freedom Technique                                   |
| GCP     | Good Clinical Practice                                        |
| FACIT   | Functional Assessment of Chronic Illness Therapy              |
| ICF     | Informed consent form                                         |
| I-group | Intervention group                                            |
| KULAK   | Katholieke Universiteit Leuven, campus Kortrijk               |
| SAE     | Serious Adverse Event                                         |
| UZB     | UZ Brussel                                                    |
| UZG     | UZ Gent                                                       |
| VAT     | Value-added tax                                               |

**1. Trial Management Group**

|                                |                                                                                                                                                                                                                                                                                                                                                                    |
|--------------------------------|--------------------------------------------------------------------------------------------------------------------------------------------------------------------------------------------------------------------------------------------------------------------------------------------------------------------------------------------------------------------|
| <b>Chief investigator</b>      | Prof. Dr. Philip Debruyne<br>Medical Oncology<br>Cancer Centre – General Hospital Groeninge<br>Loofstraat 43, B-8500 Kortrijk, Belgium<br>Phone No: 056/ 63 39 21<br>Fax No: 056/ 63 39 09                                                                                                                                                                         |
| <b>Local Investigators</b>     | Dr. Christine Langenaeken<br>Medical Oncologist<br>General Hospital Klina Brasschaat, Brasschaat, Belgium<br><br>Dr. Christel Fontaine<br>Medical Oncologist<br>Brussels University Hospitals, Brussels, Belgium                                                                                                                                                   |
| <b>External collaborators</b>  | Prof. Dr. Patricia Schofield<br>Deputy Dean for Research and Income Generation<br>Faculty of Health, Social Care and Education<br>Anglia Ruskin University, Chelmsford, United Kingdom<br><br>Kathleen Meryck, PTCouns, MNCP (Snr.Accred.)<br>AAMET International EFT Practitioner<br>Integrative Holistic Therapist in Private Practice<br>London, United Kingdom |
| <b>Senior Statistician</b>     | Prof. Dr. Hans Pottel<br>Biostatistician<br>Department of Public Health and Primary Care<br>Catholic University Leuven, campus Kortrijk (KULAK), Kortrijk,<br>Belgium                                                                                                                                                                                              |
| <b>Study Trial Coordinator</b> | Mrs. Michelle Lycke, MSc<br>Cancer Centre<br>Multidisciplinary Geriatric Oncology Clinic<br>General Hospital Groeninge, Kortrijk, Belgium                                                                                                                                                                                                                          |

**PROTOCOL APPROVAL FOR LOCAL INVESTIGATORS**

I agree to the terms of this study protocol. I will conduct the study according to the procedures specified herein, and according to principles of Good Clinical Practice and local regulations and requirements.

\_\_\_\_\_  
Name Signature Date

## Trial summary

### Background

Cognitive complaints in cancer patients are frequent side effects that can persist even long after patients have finished their cancer treatments. Physicians first attributed these problems to chemotherapy. The term “chemobrain” was coined as a description of cognitive dysfunctions in cancer patients. Nevertheless, this term is somewhat unfavourable since patients who do not receive chemotherapy can also experience cognitive complaints. Recent insights have shed light to this matter and have suggested that distress, worry and fatigue can be precursors for this syndrome.

### Aims

The aim of this study is to examine the efficacy of emotional freedom techniques (EFT) to reduce stress and thus lessen those cognitive complaints.

### Design

A prospective, interventional study.

### Study Centres

|                       |                                                         |
|-----------------------|---------------------------------------------------------|
| Coordinating centre   | General Hospital Groeninge (Kortrijk, Belgium)          |
| Participating centres | General Hospital Klina Brasschaat (Brasschaat, Belgium) |
|                       | University Hospitals Brussels (Brussels, Belgium)       |
|                       | KULeuven-kulak (Kortrijk, Belgium)                      |

### Population

All consenting patients aged 18 years or above, who have been diagnosed with a solid tumour of hematologic malignancy and who have completed or are in the late phase of a chemotherapy, radiotherapy, anti-hormonal or targeted therapy treatment. Patients should suffer from subjective cognitive complaints based on a score of 43 or more on the Cognitive Failure Questionnaire.

### Endpoints

|                  |                                                                                                                                                                                                                                                                                                                                                                                           |
|------------------|-------------------------------------------------------------------------------------------------------------------------------------------------------------------------------------------------------------------------------------------------------------------------------------------------------------------------------------------------------------------------------------------|
| <b>Primary</b>   | Efficacy of EFT to reduce cognitive complaints                                                                                                                                                                                                                                                                                                                                            |
| <b>Secondary</b> | Efficacy of EFT to reduce psychological distress<br>Efficacy of EFT to reduce fatigue<br>Efficacy of EFT in enhancing quality of life<br>Effect of EFT on patients’ professional lives<br>Comparison of the efficacy of EFT between younger and older cancer patients<br>Prevalence of cognitive complaints in cancer survivors<br>Predictors of cognitive complaints in cancer survivors |

### Duration

Patients will be recruited from June 2016 till August 2018

### Conclusions

Cognitive complaints can persist even long after treatment has ended. For many cancer survivors, these troubles can result in difficulties when they try to resume their former social and professional lives. Emotional freedom techniques could aid in reducing these cognitive complaints.

## 2. Background and rationale

During the last decade, a great deal of interest has gone to the optimization of cancer therapies resulting in better treatments and a higher life expectancy. Despite this, not all patients completely recover from their intensive treatments (1). Many of them suffer from long-term side effects such as cognitive complaints. These cancer-related cognitive problems have been defined with terms as *chemobrain* and *chemofog*. Although widely accepted, the term *chemobrain* is somewhat unfavourable as not all patients suffering from these cognitive complaints received a chemotherapy treatment (2). Further, studies have shown that cancer-related cognitive complaints are not always present through neuropsychological testing (3). Research has shown that neuropsychological disorders in cancer patients can evolve out of psychosocial risk factors such as distress which includes worry, anxiety and fatigue (4). Distress is defined as a multifactorial unpleasant emotional experience of psychological (cognitive, behavioral and emotional), social and/or spiritual nature that may interfere with the ability to cope with cancer effectively, its physical symptoms and its treatment. Distress extends along a continuum, ranging from common normal feelings of vulnerability, sadness and fear to problems that can become disabling such as depression, anxiety, panic, social isolation, and existential and spiritual crisis (5). Especially when looking at work resumption, having a cancer-related cognitive disorder can be a burden (6). Affected survivors are known to be more easily distracted, have difficulties to concentrate and experience troubles when processing new information (7). Further, a recent study by Lycke et al. (2016) reported that the level of distress can predict subjective cognitive complaints (8).

With this project we aim to lessen cognitive complaints through reducing the amount of distress patients experience with a method called ‘Emotional Freedom Techniques’. Emotional Freedom Techniques or EFT is a brief and easy to learn exposure therapy with a somatic and cognitive component. It is a self-help tool which involves tapping specific acupressure points on the top of the head, the face, collarbone and under the arm (9). By stimulating acupressure points (somatic component), imbalances in the body are detected and restored (10). The cognitive component involves a psychological technique called conditioned response. Every time the patient thinks of a traumatic memory, a high level of distress that is linked to that memory, occurs. EFT first tries to measure the intensity of the patient’s emotion that is associated with that traumatic memory. In this trial, the traumatic events are the cancer diagnosis and its treatment(s). When the intensity of that memory is established, patients are asked to pair that memory with a statement of self-acceptance. Then, through tapping on a series of acupressure points on the face and body, the brain receives a calming signal telling yourself that you are safe. Before EFT treatment, when thinking of the traumatic memory, the body goes into a conditioned stress response. However, through EFT, that stress response gets broken. Once reconditioned, it usually stays that way (11).

Several randomized controlled clinical trials have shown that EFT is an effective treatment for a number of conditions including psychological distress, anxiety, depression, phobias and post-traumatic stress disorder (12, 13). Church et al. (2012) investigated symptoms of psychological distress and cortisol levels in a group of patients who were randomly assigned to receive (1) EFT, (2) psychotherapy or (3) no therapy. The EFT-group showed a significant reduction of their symptoms and cortisol level (13). A trial by Bougea et al. (2013) reported that EFT can reduce stress in patients with headaches (14). Another study by Chatwin et al. (2016) randomly assigned patients to an EFT-program or to a cognitive behavioural therapy program. Although both treatments results in a reduction of the patients’ symptoms, this reduction only remained present in the EFT-group at 3 and 6 months follow-up (15). More recently, EFT was studied as a treatment to reduce the side effects of tamoxifen and aromatase inhibitors in women with breast cancer. Results indicated that – although preliminary – EFT may be an efficacious and safe self-help tool to improve patients’ quality of life as

it is helpful in reducing hot flushes, night sweats, fatigue and mood changes in the population under study (16).

### **3. Trial objectives**

#### **3.1. Primary objective**

The primary aim of this trial is to examine the efficacy of EFT to reduce subjective cognitive complaints, as determined through the Cognitive Failure Questionnaire, in cancer patients who have completed or are in the late phase of a chemotherapy, radiotherapy, anti-hormonal or targeted therapy treatment

#### **3.2. Secondary objectives**

The secondary objectives entail:

- Efficacy of EFT to reduce psychological distress
- Efficacy of EFT to reduce fatigue
- Efficacy of EFT in enhancing quality of life
- Effect of EFT on patients' professional lives
- Comparison of the efficacy of EFT between younger and older cancer patients
- Prevalence of cognitive complaints in cancer survivors
- Predictors of cognitive complaints in cancer survivors

### **4. Study population**

The study population consists of cancer patients aged 18 years or above, who have been diagnosed with a solid tumor of hematologic malignancy and who have completed or are in the late phase of a chemotherapy, radiotherapy, anti-hormonal or targeted therapy treatment. Patients should suffer from subjective cognitive complaints based on a score of 43 or more on the Cognitive Failure Questionnaire (17).

#### **4.1. Inclusion criteria**

- Patients should have reached a minimum age of 18 years at the time of enrolment
- Histologically confirmed diagnosis of a solid cancer or hematologic malignancy
- Patients should have received chemo- or radiotherapy, hormonal treatment or targeted therapy before enrollment (active treatment with anti-hormonal therapy or brachytherapy is allowed)
- Patients can be included in the latest phase of their chemotherapy, radiotherapy, anti-hormonal or targeted therapy treatment
- Patients should have been treated with curative intent or have an expected life expectancy of at least 5 years
- Patients must suffer from subjective cognitive complaints based on the Cognitive Failure Questionnaire (cut-off  $\geq 43$ )
- Patients should be able to adequately communicate in Dutch or French
- Patients should present with a sufficient mental and physical functional status (according to investigator's judgment and first baseline assessment) for completing the questionnaires and neuropsychological assessment

#### **4.2. Exclusion criteria**

- Patients who do not meet the inclusion criteria

- Patients who are younger than 18 at the time of enrollment
- Patients who received a treatment with palliative intent
- Patients showing signs of mental deterioration
- Patients suffering from organic brain syndrome (concussion without neurological symptoms and negative imaging is allowed)
- Patients who are alcohol or drug dependent
- Patients with a major psychiatric or neurologic disorder that could potentially invalidate assessment; a prior or current diagnosis of a depressive, anxiety or adjustment disorder is allowed

#### 4.3. Sample size

Sample size calculations are based on following assumptions. All patients included in the trial will present with cognitive complaints (proportion = 1.00) at baseline. Subjective cognitive complaints are based on a score of 43 or more on the Cognitive Failure Questionnaire. After EFT intervention, we will find a difference of 0.25 between both groups. We expect no difference in the control group, whereas fewer patients in the intervention group will report cognitive complaints. We aim to include a total of 118 evaluable patients across the different hospitals. We expect a dropout of 15% and will therefore include maximum 140 patients. An evaluable patient is defined as a patient who was completed all study procedures.

#### Two Independent Proportions (Null Case) Power Analysis Numeric Results of Tests Based on the Difference P1 - P2

**H0: P1-P2=0. H1: P1-P2=D1<>0. Test Statistic: two-sided Z test with pooled variance**

|        | Sample Size | Sample Size | Prop H1<br>Grp 1<br>of<br>Trtmnt | Prop<br>Grp 2<br>or<br>Control | Diff<br>if H0 | Diff<br>if H1 | Target | Actual |        |
|--------|-------------|-------------|----------------------------------|--------------------------------|---------------|---------------|--------|--------|--------|
| Power  | N1          | N2          | P1                               | P2                             | D0            | D1            | Alpha  | Alpha  | Beta   |
| 0.9511 | 95          | 95          | 1.0000                           | 0.7500                         | 0.0000        | 0.2500        | 0.0500 | 0.0499 | 0.0489 |
| 0.9022 | 76          | 76          | 1.0000                           | 0.7500                         | 0.0000        | 0.2500        | 0.0500 | 0.0499 | 0.0978 |
| 0.8541 | 65          | 65          | 1.0000                           | 0.7500                         | 0.0000        | 0.2500        | 0.0500 | 0.0443 | 0.1459 |
| 0.8087 | 59          | 59          | 1.0000                           | 0.7500                         | 0.0000        | 0.2500        | 0.0500 | 0.0528 | 0.1913 |

## 5. Study design

### 5.1. Randomization

The study will be a randomized wait-list controlled trial examining the feasibility and efficacy of EFT as a psychosocial intervention to reduce cognitive complaints in cancer patients. Patients will be allocated into the intervention or control group based on age, gender, treatment and centre.

### 5.2. Main trial design

The study design is presented in Figure 1. The study will be presented by the treating physician, the study coordinator, study nurse or onco-psychologist to patients who are about to finish their active cancer treatment. Patients who already received a curative radio- of chemotherapy treatment or patients who have cancelled their treatment can also participate in this trial. Patients willing to participate will be asked to sign the informed consent and need to fill out an intake form which contains the Cognitive Failure Questionnaire (CFQ). Patients scoring 43 or above will be considered as having subjective cognitive complaints and will go on to the randomization process. Patients



presenting with a score less than 43 will receive an information brochure on cognitive complaints in cancer patients. This brochure will contain information on cognitive dysfunctions in an oncology setting. It will also include some exercises on coping methods. Patients who do present with cognitive complaints will first receive a baseline assessment (T1).

After baseline assessment, patients will be randomized into either the control group (C-group) or the intervention group (I-group). Patients in the intervention group will be scheduled to receive an 8-week EFT intervention program. The EFT program will include three 1-hour sessions, once a week during the first three weeks of the program with a study coordinator, study nurse or onco-psychologist who have been trained to perform EFT. During the first EFT session, participants will be taught how to perform EFT and how it can be used as an application for mood and physical side effects. They will be given an information brochure which includes a section illustrating the application of the tapping protocol, to aid home practice and a notebook containing a structured self-work outline, a diagram of tapping points and a self-measurement scale to complete. Patients will be asked to report in their brochure when they have used EFT. During the second EFT session, the first week will be evaluated. The final session will focus on fine-tuning of the method. Subsequently, patients will be encouraged to use the learned technique at least twice daily. After this period, participants will be scheduled for a second assessment (T2) where we want to examine whether the cognitive complaints have been reduced. Patients will be asked to fill in the CFQ and the other measures mentioned in Table 1.

Patients randomized in the control group will be put on an 8-week lasting waiting list after which they will also receive the second assessment (T2). Thereafter, the C-group patients will receive the same EFT program as patients of the I-group. Eight weeks thereafter, both patients groups will be scheduled for a final assessment (T3).

The study trial coordinator of the hospital will schedule patient's visits. If possible, visits will be schedule before or after doctor appointments.

The primary endpoint will be reached after the first period of 8 weeks where we will look at the reduction of cognitive complaints based on the CFQ.

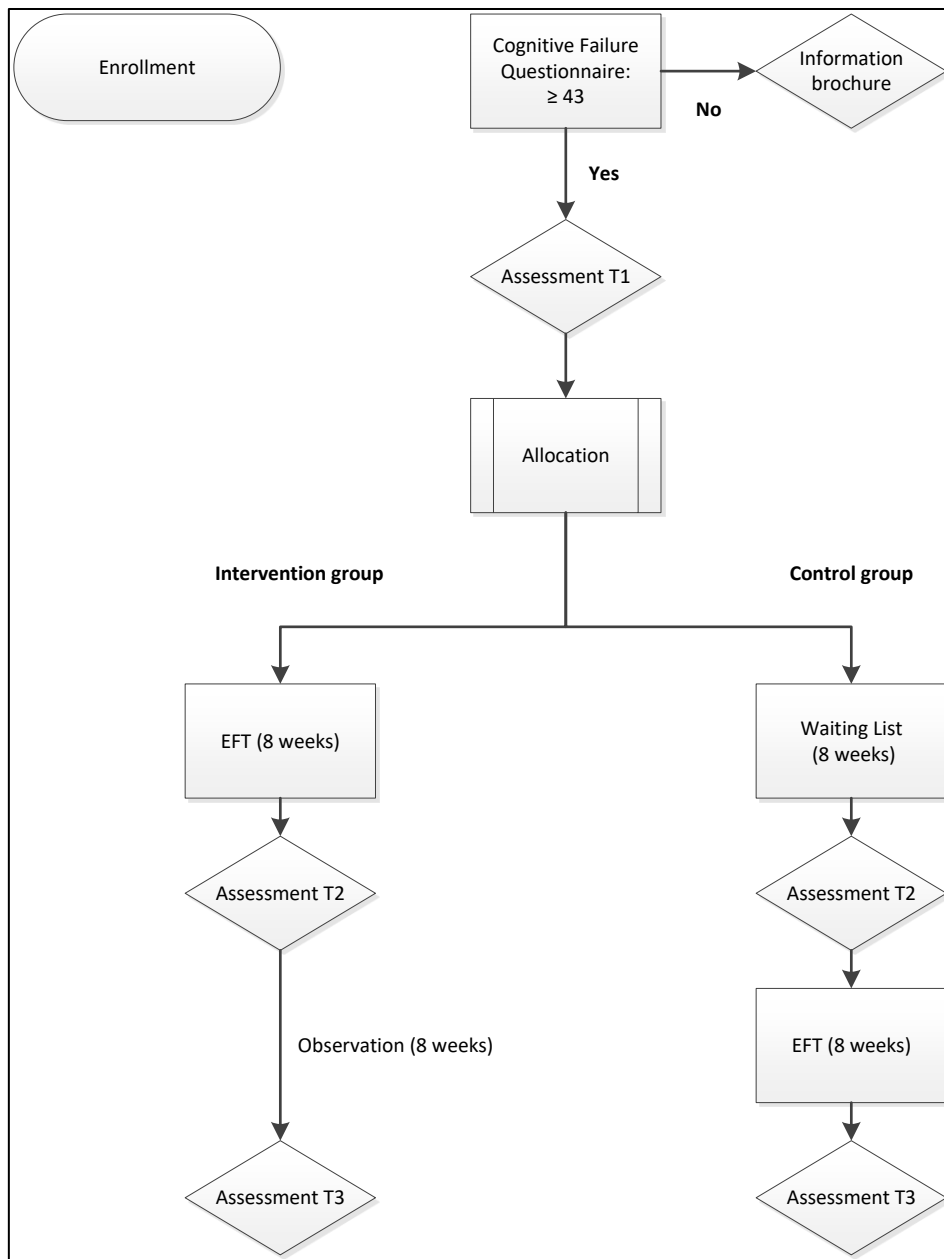

Figure 1. Trial design

## 6. Study procedures

A designated person will be responsible to fill out the Case Report Form (CRF). The CRF includes dates regarding study procedures and demographic, social and medical data. The medical data will be collected through a review of the patient’s medical record. Medical data concerning diagnosis and treatment, ECOG performance score, concomitant medications and comorbidities will be collected. Comorbidities will be scores by the Charlson Comorbidity Index. Scoring guidelines are presented in Appendix 1. In case of a screening failure, the patient’s age, gender, highest education, diagnosis, received treatment, time between treatment end and screening date and the CFQ-score will be recorded. In case of termination of participating, this will also be recorded in the CRF.

The assessment at T1, T2 and T3 will include the Cognitive Failure Questionnaire and subjective measures such as the Distress Thermometer accompanied by the 38-item Problem List, Functional Assessment of Cancer Therapy-Fatigue Subscale and the European Organisation for the Research and

Treatment of Cancer 30-item Quality of Life scale (Table 1). A telephone-based long term follow up will be foreseen six and twelve months after the start of the EFT treatment through EuroQol analysis.

Table 1. Study procedures

| Study assessment                | Domain                                                                                                   | T1            | T2 | T3 | Time          |
|---------------------------------|----------------------------------------------------------------------------------------------------------|---------------|----|----|---------------|
| Cognitive Failure Questionnaire | Subjective cognitive functioning                                                                         | X<br>(intake) | X  | X  | 5 min         |
| Distress Thermometer            | Distress                                                                                                 | X             | X  | X  | 2 min         |
| 38-item Problem List            | Identification of problems in 5 domains (Practical, family, emotional, spiritual/religious and physical) | X             | X  | X  | 3 min         |
| Beck Depression Inventory-II    | Depression                                                                                               | X             | X  | X  | 5 min         |
| FACIT-Fatigue Scale             | Fatigue                                                                                                  | X             | X  | X  | 3 min         |
| EORTC QLQ-C30                   | Assessment of quality of life in cancer patients                                                         | X             | X  | X  | 5 min         |
| EuroQol                         | Assessment of quality-adjusted life years                                                                | X             | X  | X  | 2 min         |
| <b>Total Time Span</b>          |                                                                                                          |               |    |    | <b>25 min</b> |

#### 6.1. Cognitive Failure Questionnaire (appendix 2)

The Cognitive Failures Questionnaire (CFQ) is a questionnaire containing 25 items and was developed by Broadbent et al. in 1982 to assess the frequency of everyday slips and errors. Each item refers to a particular type of mistake such as forgetting names or bumping into people. Participants are asked to indicate, on a five-point scale ranging from never to very often, how many times the particular error occurs. The CFQ seems to provide unique information because it is largely unrelated to standard personality and intelligence scales (17).

#### 6.2. Distress Thermometer and 38-item Problem List (appendix 3)

The Distress Thermometer (DT) and the 38-item Problem List, both developed and recommended by the NCCN Guidelines in Distress Management, serve as a rough initial single-item screening tool to identify distress caused by any kind of source, even if unrelated to cancer. Patients are asked to mark how distressed they have been during the past week on a scale from 0 to 10. Scores of four or higher suggest a level of distress that has clinical significance (18).

#### 6.3. Beck Depression Inventory-II (appendix 4)

The Beck Depression Inventory-II comprises 21 questions that assess the intensity, severity and depth of depression in patients with psychiatric diagnoses. It further has been found to an effective screening tool in adolescents. The questionnaire uses a 4-point Likert scale, with higher scores indicating more severe depression (19, 20).

#### 6.4. Functional Assessment of Chronic Illness Therapy-Fatigue Subscale (appendix 5)

The Functional Assessment of Chronic Illness Therapy-Fatigue Subscale (FACIT-Fatigue) is a brief questionnaire that is part of the 20-item anemia module of the Functional Assessment of Cancer Therapy quality of life assessment system. The FACIT-Fatigue consist of 13 items ranging on a 5-point Likert-Scale. Scores can range between 0 and 52 with lower scores indicating a greater fatigue (21, 22).

## 6.5. Quality of life

### 6.5.1. EORTC QLQ C-30 (appendix 6)

The European Organisation for the Research and Treatment (EORTC) has developed and validated different questionnaires to assess the quality of life in cancer patients. The European Organisation for the Research and Treatment of Cancer Quality of Life Questionnaire (EORTC QLQ) -C30 was validated to assess quality of life in cancer patients. This core questionnaire enables assessment of the generic aspects of quality of life in cancer patients and provides a good reflection of the quality of life in general and of the functional, physical, cognitive, emotional, social and nutritional status in particular (23).

### 6.5.2. EQ-5D (appendix 7)

To assess long term quality of life, a standard EuroQoL EQ-5D questionnaire will be implemented (<http://www.euroqol.org>). EQ-5D is a simple questionnaire that scores patients, based on five health domains (mobility, self-care, daily activities, pain/inconvenience and anxiety/depression). The obtained score indicates the quality of life of the patient.

## 7. Responsibilities

The table below gives an overview as to which persons are responsible for the specific study procedures.

| Procedure           | Responsible person                                                                                                                                                                   |
|---------------------|--------------------------------------------------------------------------------------------------------------------------------------------------------------------------------------|
| Patient recruitment | Chief investigator<br>Local investigator<br>Treating physician<br><i>The study trial coordinator or local study nurse can help with the explanation of the informed consent form</i> |
| Screening           | Study trial coordinator<br>Local study nurse                                                                                                                                         |
| Assessments         | Study trial coordinator<br>Local study nurse                                                                                                                                         |
| EFT-program         | Study trial coordinator<br>Local study nurse<br>Assigned EFT-coach                                                                                                                   |

The person who will be responsible for the EFT-program will be a nurse, psychologist or study coordinator/nurse with experience in the field of oncology. The study trial coordinator has received external EFT-training and will be responsible to train the other EFT-coaches in this trial. Training will be given in one half-day at the local site and includes an overview of the background of EFT (30 min), application of the technique (1hr30) and one-on-one sessions by use of the patient's information brochure (2hrs).

## 8. Potential risks and benefits

EFT is a non-invasive therapeutic technique. It has been assessed in several randomized controlled clinical trials (12, 13). These trials have shown that EFT is safe to administer (16).

Patients may benefit from this study since – at present – there is no treatment available to reduce cognitive complaints. This trial may benefit their present and long-term quality of life.

## 9. Safety and reporting

### 9.1. Adverse events (AE) and serious adverse events (SAE)

All adverse events (AE) should be on the CRF. All AE's will be assessed for severity according to the NCI's Common Terminology Criteria for Adverse Events (CTCAE; version 4.0). The investigator will decide if those events are related to intervention (not related, unlikely, possible or probable) and his/her decision will be recorded on the forms for all adverse events. Adverse events not related to the intervention (i.e. reported as not related or unlikely) will not be considered as adverse reaction or toxicity, but reported separately.

The CTCAE v4.0 is available at: [http://evs.nci.nih.gov/ftp1/CTCAE/CTCAE\\_4.03\\_2010-06-14\\_QuickReference\\_5x7.pdf](http://evs.nci.nih.gov/ftp1/CTCAE/CTCAE_4.03_2010-06-14_QuickReference_5x7.pdf)

The relationship to the EFT-program will be determined according to the following criteria:

- Not related : there is a clear alternative explanation or the relationship is not plausible.
- Unlikely (doubtful/remote): a clinical event with an improbable time sequence to the psychological intervention and in which other drugs, chemicals or underlying disease provide plausible explanations.
- Possible : a clinical event with a reasonable time sequence to a to the psychological intervention, which could also be explained by concurrent disease of other drugs or chemicals. Information on drug withdrawal may be lacking or unclear.
- Probable : a clinical event with a reasonable time sequence to the psychological intervention, unlikely to be attributed to concurrent disease or other drugs or chemicals, and which follows a clinically reasonable response on withdrawal (dechallenge).

A serious adverse event (SAE) observed by the chief investigator should be reported to the main REC within 15 days of the chief investigator becoming aware of the event, through the SAE report form included in the protocol (appendix 8). Urgent safety measures should be reported immediately (by fax or telephone) to the main REC.

A Serious adverse event is defined as any untoward medical occurrence or effect that in any form:

- Results in death;
- Is life-threatening;
- Requires hospitalization or prolongation of existing inpatient hospitalization;
- Results in persistent or significant disability or incapacity;
- Consists of a congenital anomaly or birth defect;
- Is otherwise considered medically significant by the investigator

An SAE occurring to a research participant should be reported to the main REC where in the opinion of the Chief Investigator the event was:

- Related: that is, it resulted from an administration of any of the research procedures, and
- Unexpected: that is, the type of event is not listed in the protocol as an expected occurrence

### 9.2. Follow-up of adverse event

All adverse events must be documented and followed up until the event is either resolved or adequately explained, even after the subject has completed his/her study treatment. Unrelated or

moderate events must be followed for 15 days after EFT application, and will be re-evaluated by the treating physician at the first follow-up visit. Severe, life-threatening or related events must be followed until resolution, the patient's death, the start of a new therapy or the relationship is re-assessed.

## **10. Patient protection and ethical considerations**

### **10.1. Ethics approval and informed consent**

Documented approval from the ethics committees (EC) of the participating hospitals will be required prior to study start, according to Good Clinical Practice (GCP) and Belgian law and regulation.

Patients will be asked to sign the informed consent form (ICF) after having both verbal and written information about the nature, purpose, possible risk and benefit of the observational study. For subjects not capable of giving legal consent, written consent must be obtained from the legally acceptable representative. In the case where both the subject and his/her legally acceptable representative are unable to read, an impartial witness should be present during the entire informed consent discussion. Patients must also be notified that they are free to discontinue from the study at any time. The patient should be given the opportunity to ask questions and allowed time to consider the information provided. All consent forms must be countersigned by the Principal Investigator, local investigator or a designated individual, and a record of who the designated individuals are, and the circumstances under which they countersign consent forms, must be clearly documented at the research site and be available for inspection. The local investigator is responsible for the collection and storage of the original signed informed consent. A copy of the signed informed consent will be collected by the study trial coordinator.

The trial will be conducted in accordance with the Declaration of Helsinki on Ethical Principles for Medical Research Involving Human Subjects, adopted by the General Assembly of the World Medical Association (1996).

Conform to the Belgian Law, the ethical committee of Ghent University Hospital will function as the central ethical committee.

### **10.2. Patient confidentiality**

The patient's full name and date of birth will be collected to allow tracing through records. The personal data recorded on all documents will be regarded as confidential. To preserve each subject's anonymity, a study code will be recorded on subsequent Case Report Forms (CRFs) and ICF. The study code will contain the study centre code and a sequential patient identification number.

### **10.3. Data collection**

Data will be collected in CRFs provided by the coordinating center. CRFs will be stored locally and will be the responsibility of the local investigator. The investigator must ensure the patient's confidentiality is maintained. Source documents are filed at the local investigator's site. Source documents provide evidence for the existence of the patient and substantiate the integrity of the data collected. Data entered in the CRFs that are transcribed from source documents must be consistent with the source documents or the discrepancies must be explained. The local investigator / institution will permit trial-related monitoring, audits, ethics committee review and regulatory inspection, providing direct access to the CRFs and all related source documents. Study findings stored on a computer will be stored in accordance with Belgian data protection laws. The local investigator must

maintain all study records, patient files and other source data for at least 20 years upon completion of the trial.

#### 10.4. Patient insurance

All patients participating in the study will have insurance coverage by the sponsor (General Hospital Groeninge), which is in line with applicable laws and/or regulations. With this “no fault” insurance all patients are insured under the terms and conditions of the Belgian Law of 7 May 2004. General Hospital Groeninge has concluded a study insurance with KBC Corporate Insurance. The trial is known at the insurance company under the name ‘BSMO-EFT’.

### 11. Publication policy

Authorship of any publications resulting from this study will be determined on the basis of the Uniform Requirement for Manuscripts Submitted to Biomedical Journals (International Committee of Medical Journal Editors, 2006), which states:

- Authorship credit should be based on (1) substantial contributions to conception and design, acquisition of data, or analysis and interpretation of data; (2) drafting the article or revising it critically for important intellectual content; (3) final approval of the version to be published. Authors should meet conditions 1, 2, and 3.
- Acquisition of funding, collection of data, or general supervision of the research group, alone, does not justify authorship.
- All persons designated as authors should qualify for authorship, and all those who qualify should be listed.
- Each author should have participated sufficiently in the work to take public responsibility for appropriate portions of the content.

In accordance with these guidelines local investigators enrolling at least 10% of the eligible patients will be allowed as author on the submitted and published manuscript comprising the analysis of the primary endpoint. Local study centres who have enrolled 25% of patients or more will be allowed to include a second author representing their centre on submitted and published manuscript comprising the analysis of the primary endpoint. The study trial coordinator and chief investigator will be the first and last author, respectively, and the abovementioned 10% criteria does not apply to them, nor to the (external) collaborators and senior statistician. Other publications and rules for publication will be decided by the trial management group of the EMOTICON-trial.

### 12. Financial matters

This trial is supported by ‘Kom Op Tegen Kanker’ funding innovative projects in psychosocial care for people with cancer. No extra charges are anticipated for the patients. The coordinating (AZG) and participating centers (AZ Klina Brasschaat, UZ Gent, UZ Brussel) will receive an investigator fee per included patient who has completed all study procedures. These patients are referred to as evaluable patients. No financial reimbursement is foreseen for who do not complete all study procedures. The KULAK will receive a statistical consultancy fee. Retaining overhead or VAT is not allowed. A complete overview of the financial aspects are listed below.

Table 2. Budget details

| <b>Personnel</b> |                    |                      |                   |
|------------------|--------------------|----------------------|-------------------|
| <b>Partner</b>   | <b>Description</b> | <b>Budget detail</b> | <b>Total cost</b> |

|                                |                                                                              |                                           |                 |
|--------------------------------|------------------------------------------------------------------------------|-------------------------------------------|-----------------|
| AZG                            | Study trial coordinator (20% FTE)                                            | €13.000 annually                          | € 39.000        |
| AZG, UZB, AZ Klinia Brasschaat | Study nurse – psychologist (EFT); calculated as investigator fee per patient | €400 per evaluable patient x 118 patients | € 47.200        |
| <b>Other costs</b>             |                                                                              |                                           |                 |
| AZG                            | Coordination cost                                                            |                                           | € 2.500         |
|                                | Travel expenses                                                              |                                           | € 1.000         |
|                                | EFT Training                                                                 |                                           | € 900           |
|                                | Software                                                                     |                                           | € 1.000         |
|                                | Publication fees                                                             |                                           | € 1.750         |
| KULAK                          | Statistical consultancy fee                                                  |                                           | € 1.500         |
| <b>Total budget</b>            |                                                                              |                                           | <b>€ 94.850</b> |

### 13. References

1. Grassi L, Gritti P, Rigatelli M, Gala C. Psychosocial problems secondary to cancer: an Italian multicentre survey of consultation-liaison psychiatry in oncology. Italian Consultation-Liaison Group. *European journal of cancer*. 2000;**36**(5):579-85.
2. Hurria A, Somlo G, Ahles T. Renaming "chemobrain". *Cancer investigation*. 2007;**25**(6):373-7, 10.1080/07357900701506672.
3. Hutchinson AD, Hosking JR, Kichenadasse G, Mattiske JK, Wilson C. Objective and subjective cognitive impairment following chemotherapy for cancer: A systematic review. *Cancer treatment reviews*. 2012;**38**(7):926-34, DOI 10.1016/j.ctrv.2012.05.002.
4. Moore HCF. An Overview of Chemotherapy-Related Cognitive Dysfunction, or 'Chemobrain'. *Oncology-Ny*. 2014;**28**(9):797-804.
5. NCCN. Distress Management. Clinical Practice Guidelines in Oncology [Internet]. Version 3.2012. Available from: [www.NCCN.org](http://www.NCCN.org).
6. Boykoff N, Moieni M, Subramanian SK. Confronting chemobrain: an in-depth look at survivors' reports of impact on work, social networks, and health care response. *Journal of cancer survivorship : research and practice*. 2009;**3**(4):223-32, 10.1007/s11764-009-0098-x.
7. Koppelmans V, Breteler MM, Boogerd W, Seynaeve C, Gundy C, Schagen SB. Neuropsychological performance in survivors of breast cancer more than 20 years after adjuvant chemotherapy. *Journal of clinical oncology : official journal of the American Society of Clinical Oncology*. 2012;**30**(10):1080-6, 10.1200/JCO.2011.37.0189.
8. Lycke M, Pottel L, Pottel H, Ketelaars L, Stellamans K, Van Eygen K, et al. Predictors of baseline cancer-related cognitive impairment in cancer patients scheduled for a curative treatment. *Psycho-oncology*. 2016, 10.1002/pon.4200.
9. Church D, Hawk C, Brooks AJ, Toukolehto O, Wren M, Dinter I, et al. Psychological trauma symptom improvement in veterans using emotional freedom techniques: a randomized controlled trial. *The Journal of nervous and mental disease*. 2013;**201**(2):153-60, 10.1097/NMD.0b013e31827f6351.
10. Patil S, Sen S, Bral M, Reddy S, Bradley KK, Cornett EM, et al. The Role of Acupuncture in Pain Management. *Curr Pain Headache Rep*. 2016;**20**(4):22, 10.1007/s11916-016-0552-1.
11. Church D. The EFT Mini-Manual (Emotional Freedom Techniques). Fulton, CA: Energy Psychology Press; 2012.
12. Feinstein D. Acupoint stimulation in treating psychological disorders: evidence of efficacy. *Rev Gen Psychol* 2012;**16**:364-80.



13. Church D, Yount G, Brooks AJ. The effect of emotional freedom techniques on stress biochemistry: a randomized controlled trial. *The Journal of nervous and mental disease*. 2012;**200**(10):891-6, 10.1097/NMD.0b013e31826b9fc1.
14. Bougea AM, Spandideas N, Alexopoulos EC, Thomaidis T, Chrousos GP, Darviri C. Effect of the emotional freedom technique on perceived stress, quality of life, and cortisol salivary levels in tension-type headache sufferers: a randomized controlled trial. *Explore (NY)*. 2013;**9**(2):91-9, 10.1016/j.explore.2012.12.005.
15. Chatwin H, Stapleton P, Porter B, Devine S, Sheldon T. The Effectiveness of Cognitive Behavioral Therapy and Emotional Freedom Techniques in Reducing Depression and Anxiety Among Adults: A Pilot Study. *Integr Med (Encinitas)*. 2016;**15**(2):27-34.
16. Baker B, Hoffman C. Emotional Freedom Techniques (EFT) to reduce the side effects associated with Tamoxifen and Aromatase Inhibitor use in women with breast cancer: A service evaluation. *European Journal of Integrative Medicine*. 2014;**Epub ahead of print**.
17. Broadbent D. Cognitive Failure Questionnaire (Cfq). *B Brit Psychol Soc*. 1980;**33**(Jan):26-.
18. NCCN Guidelines in Distress Management 2012; 3. Available from: [www.NCCN.org](http://www.NCCN.org).
19. Beck AT, Beamesderfer A. Assessment of depression: the depression inventory. *Mod Probl Pharmacopsychiatry*. 1974;**7**(0):151-69.
20. Church D, De Asis MA, Brooks AJ. Brief group intervention using emotional freedom techniques for depression in college students: a randomized controlled trial. *Depression research and treatment*. 2012;**2012**:257172, 10.1155/2012/257172.
21. Cella D. The Functional Assessment of Cancer Therapy-Anemia (FACT-An) Scale: a new tool for the assessment of outcomes in cancer anemia and fatigue. *Semin Hematol*. 1997;**34**(3 Suppl 2):13-9.
22. Cella D. Functional Assessment of Cancer Therapy Website. Available from: <http://www.facit.org>.
23. Balducci L. NCCN Senior Adult Oncology Panel report. *Journal of the National Comprehensive Cancer Network : JNCCN*. 2004;**2 Suppl 3**:S-42-5.

## Appendix 1. Scoring guidelines for the Charlson Comorbidity Index

Instructions: score 1, 2, 3 or 6 points as marked in the column next to the comorbidity, if the comorbidity is present. Table 3 shows a description of the included conditions.

Table 3. Description of comorbidities included in the Charlson Comorbidity Index

|                                                | Description                                                                                                                                  |
|------------------------------------------------|----------------------------------------------------------------------------------------------------------------------------------------------|
| 1. Myocardial infarction                       | History of medically documented myocardial infarction                                                                                        |
| 2. Congestive heart failure                    | Symptomatic CHF with response to specific treatment                                                                                          |
| 3. Peripheral vascular disease                 | Intermittent claudication, peripheral arterial bypass for insufficiency, gangrene, acute arterial insufficiency, untreated aneurysm (> 6 cm) |
| 4. Cerebrovascular disease (except hemiplegia) | History of TIA, or CVA with no or minor sequelae                                                                                             |
| 5. Dementia                                    | Chronic cognitive deficit                                                                                                                    |
| 6. Chronic pulmonary disease                   | Symptomatic dyspnoea due to chronic respiratory conditions (including asthma)                                                                |
| 7. Connective tissue disease                   | SLE, polymyositis, mixed CTD, polymyalgia rheumatica, moderate to severe RA                                                                  |
| 8. Ulcers                                      | Patients who have required treatment for PUD                                                                                                 |
| 9. Mild liver disease                          | Cirrhosis without PHT, chronic hepatitis                                                                                                     |
| 10. Diabetes (without end-organ damage)        | Diabetes with medication                                                                                                                     |
| 11. Diabetes (with end organ damage)           | Retinopathy, neuropathy, nephropathy                                                                                                         |
| 12. Hemiplegia (or paraplegia)                 | Hemiplegia or paraplegia                                                                                                                     |
| 13. Moderate or severe chronic renal failure   | Creatinine > 3 mg/dl (265 gmol/l), dialysis, transplantation, uremic syndrome                                                                |
| 14. 2nd malignancy (non metastatic)            | Initially treated in the last 5 years.<br>Exclude: non-melanomatous skin cancers and in situ cervical carcinoma.                             |
| 15. Leukaemia                                  | CML, CLL, AML, ALL, PV                                                                                                                       |
| 16. Lymphoma                                   | Non-Hodgkin's lymphoma (NHQ, Hodgkin's, Waldenstrom, multiple myeloma)                                                                       |
| 17. Moderate or severe liver disease           | Cirrhosis with PHT +/- variceal bleeding                                                                                                     |
| 18. 2nd metastatic malignancy                  | Self-explaining                                                                                                                              |
| 19. AIDS                                       | AIDS and AIDS-related complex<br>Suggested: as defined in latest definition                                                                  |

Abbreviations:

CHF: congestive heart failure

TIA: transient ischemic attack

CVA: cerebrovascular accident

SLE: systemic lupus erythematosus

CTD: connective tissue disease

RA: rheumatoid arthritis

PUD: peptic ulcer disease

PHT: portal hypertension

CML: chronic myeloid leukemia

CLL: chronic lymphoid leukemia

AML: acute myeloid leukemia

ALL: acute lymphoblastic leukemia

PV: polycythemia vera

## Appendix 2. Cognitive Failure Questionnaire (Dutch and French version)

### → Dutch version

#### Vragenlijst CFQ (cognitive failure questionnaire : subjectief cognitief functioneren)

(Broadbent DE, et al. Br J Psychol 1982;21: 1-16.)

Invulinstructie: De volgende 25 vragen gaan over kleine, alledaagse vergissingen die iedereen van tijd tot tijd maakt. Sommige van die vergissingen overkomen u waarschijnlijk wat vaker dan andere.

Wij willen graag van u weten in hoeverre deze alledaagse vergissingen bij u zijn voorgekomen in de afgelopen 4 weken. Hieronder kunt u kiezen wat het beste bij u past. De mogelijkheden zijn: 'zeer vaak', 'vaak', 'af en toe', 'zelden' en 'nooit'.

|                                                                                                                 | <i>zeer vaak vaak af en toe zelden nooit</i> |   |   |   |   |
|-----------------------------------------------------------------------------------------------------------------|----------------------------------------------|---|---|---|---|
| 1. Iets lezen en vlak daarna niet meer weten wat u nu gelezen hebt, zodat u het moet overlezen                  | 4                                            | 3 | 2 | 1 | 0 |
| 2. Vergeten waarom u naar een bepaald gedeelte van uw huis bent gelopen                                         | 4                                            | 3 | 2 | 1 | 0 |
| 3. Wegwijzers over het hoofd zien                                                                               | 4                                            | 3 | 2 | 1 | 0 |
| 4. Links en rechts verwarren bij het beschrijven van een route                                                  | 4                                            | 3 | 2 | 1 | 0 |
| 5. Per ongeluk tegen mensen opbotsen                                                                            | 4                                            | 3 | 2 | 1 | 0 |
| 6. Niet meer weten of u het licht of het gas hebt uitgedaan, of de deur hebt afgesloten                         | 4                                            | 3 | 2 | 1 | 0 |
| 7. Niet luisteren naar de naam van een persoon op het moment dat deze persoon zich aan u voorstelt              | 4                                            | 3 | 2 | 1 | 0 |
| 8. Iets er uitflappen en achteraf bedenken dat dat wel eens beledigend voor iemand zou kunnen zijn              | 4                                            | 3 | 2 | 1 | 0 |
| 9. Niet merken dat iemand iets tegen u zegt als u met iets anders bezig bent                                    | 4                                            | 3 | 2 | 1 | 0 |
| 10. Boos worden en daar later spijt van hebben                                                                  | 4                                            | 3 | 2 | 1 | 0 |
| 11. Belangrijke brieven dagenlang onbeantwoord laten                                                            | 4                                            | 3 | 2 | 1 | 0 |
| 12. Vergeten welke straat u moet inslaan als u een route kiest die u goed kent, maar die u maar zelden gebruikt | 4                                            | 3 | 2 | 1 | 0 |
| 13. In een supermarkt niet kunnen vinden wat u zoekt terwijl het er wel is                                      | 4                                            | 3 | 2 | 1 | 0 |
| 14. U plotseling afvragen of u een woord op de juiste manier gebruikt                                           | 4                                            | 3 | 2 | 1 | 0 |
| 15. Moeite hebben met het nemen van een beslissing                                                              | 4                                            | 3 | 2 | 1 | 0 |
| 16. Afspraken vergeten                                                                                          | 4                                            | 3 | 2 | 1 | 0 |
| 17. Vergeten waar u iets hebt neergelegd, zoals een boek of een krant                                           | 4                                            | 3 | 2 | 1 | 0 |
| 18. Per ongeluk iets weggooien dat u nodig hebt en bewaren wat u weg wilde gooien                               | 4                                            | 3 | 2 | 1 | 0 |
| 19. Dagdromen terwijl u eigenlijk naar iets of iemand zou moeten luisteren                                      | 4                                            | 3 | 2 | 1 | 0 |
| 20. Namen van mensen vergeten                                                                                   | 4                                            | 3 | 2 | 1 | 0 |
| 21. Beginnen met iets maar het niet afmaken, omdat u ongemerkt met iets anders bent begonnen                    | 4                                            | 3 | 2 | 1 | 0 |
| 22. Niet op een woord kunnen komen terwijl het 'op het puntje van uw tong' ligt                                 | 4                                            | 3 | 2 | 1 | 0 |
| 23. In een winkel vergeten wat u kwam kopen                                                                     | 4                                            | 3 | 2 | 1 | 0 |
| 24. Dingen uit uw handen laten vallen                                                                           | 4                                            | 3 | 2 | 1 | 0 |
| 25. In een gesprek niets meer weten om over te praten                                                           | 4                                            | 3 | 2 | 1 | 0 |

## → French version

## Questionnaire CFQ

Instructions : les 25 questions suivants concernent des petits étourderies que tout le monde commet à certains moments. Certaines peuvent vous arriver plus fréquent que certaines des autres. Nous souhaitons savoir si vous les avez commises fréquemment pendant les 4 semaines passés. Indiquez la réponse le plus correspondante. Les possibilités sont : 'très souvent', 'assez souvent', 'occasionnellement', 'très rarement' et 'jamais'.

|                                                                                                                                                                                                          | Très souvent | Assez souvent | Occasionnellement | Très rarement | Jamais |
|----------------------------------------------------------------------------------------------------------------------------------------------------------------------------------------------------------|--------------|---------------|-------------------|---------------|--------|
| 1. Vous arrive-t-il de lire quelque chose sans être concentré et donc, de devoir le relire ?                                                                                                             | 4            | 3             | 2                 | 1             | 0      |
| 2. Vous arrive-t-il d'oublier pourquoi vous allez d'un endroit à un autre de votre appartement ?                                                                                                         | 4            | 3             | 2                 | 1             | 0      |
| 3. Vous arrive-t-il de ne pas remarquer les panneaux indicateurs sur la route ?                                                                                                                          | 4            | 3             | 2                 | 1             | 0      |
| 4. Vous arrive-t-il de confondre la gauche et la droite lorsque vous indiquez une direction ?                                                                                                            | 4            | 3             | 2                 | 1             | 0      |
| 5. Vous arrive-t-il de heurter intentionnellement les gens lorsque vous vous déplacez ?                                                                                                                  | 4            | 3             | 2                 | 1             | 0      |
| 6. Vous arrive-t-il d'oublier si vous avez éteint la lumière ou bien fermé la porte à clef ?                                                                                                             | 4            | 3             | 2                 | 1             | 0      |
| 7. Vous arrive-t-il de ne pas pouvoir retenir le nom des gens juste après qu'ils vous l'aient donné ?                                                                                                    | 4            | 3             | 2                 | 1             | 0      |
| 8. Vous arrive-t-il de dire des choses et de réaliser, après coup, que cela peut être mal pris ?                                                                                                         | 4            | 3             | 2                 | 1             | 0      |
| 9. Avez-vous du mal à écouter les gens quand vous faites quelque chose d'autre ?                                                                                                                         | 4            | 3             | 2                 | 1             | 0      |
| 10. Vous arrive-t-il de perdre votre sang froid et de le regretter ensuite ?                                                                                                                             | 4            | 3             | 2                 | 1             | 0      |
| 11. Laissez-vous, pendant des jours, une lettre importante sans réponse ?                                                                                                                                | 4            | 3             | 2                 | 1             | 0      |
| 12. Vous arrive-t-il d'oublier où vous devez tourner lorsque vous êtes sur une route que vous connaissez mais que vous utilisez peu ?                                                                    | 4            | 3             | 2                 | 1             | 0      |
| 13. Vous arrive-t-il de ne pas voir ce que vous cherchez dans un magasin ? (et qui s'y trouve !) ?                                                                                                       | 4            | 3             | 2                 | 1             | 0      |
| 14. Vous arrive-t-il de vous demander tout d'un coup si vous avez correctement employé un mot ?                                                                                                          | 4            | 3             | 2                 | 1             | 0      |
| 15. Avez-vous du mal à vous décider ?                                                                                                                                                                    | 4            | 3             | 2                 | 1             | 0      |
| 16. Vous arrive-t-il d'oublier un rendez-vous ?                                                                                                                                                          | 4            | 3             | 2                 | 1             | 0      |
| 17. Oubliez-vous l'endroit où vous avez mis (par exemple) un journal ou un livre ?                                                                                                                       | 4            | 3             | 2                 | 1             | 0      |
| 18. Vous arrive-t-il de jeter par accident ce que vous vouliez garder et de garder ce que vous vouliez jeter (par exemple, jeter un bonbon dans la poubelle et porter à la bouche le papier du bonbon) ? | 4            | 3             | 2                 | 1             | 0      |
| 19. Vous arrive-t-il d'être perdu dans vos pensées alors que vous devriez écouter ?                                                                                                                      | 4            | 3             | 2                 | 1             | 0      |
| 20. Oubliez-vous le noms des gens ?                                                                                                                                                                      | 4            | 3             | 2                 | 1             | 0      |
| 21. Vous arrive-t-il de commencer un activité et d'être distrait par quelque chose ?                                                                                                                     | 4            | 3             | 2                 | 1             | 0      |
| 22. Êtes-vous dans l'incapacité de vous rappeler un mot que vous avez 'sur le bout de la langue' ?                                                                                                       | 4            | 3             | 2                 | 1             | 0      |
| 23. Vous arrive-t-il d'aller dans un magasin et d'oublier ce que vous êtes venu y acheter ?                                                                                                              | 4            | 3             | 2                 | 1             | 0      |
| 24. Faites-vous tomber les choses ?                                                                                                                                                                      | 4            | 3             | 2                 | 1             | 0      |
| 25. Avez-vous parfois l'impression d'avoir l'esprit vide ?                                                                                                                                               | 4            | 3             | 2                 | 1             | 0      |

### Appendix 3. Distress thermometer and 38-item Problem List (Dutch and French version)

#### → Dutch version

Instructies: omcirkel eerst het nummer (0-10) die het best overeenkomt met de hoeveelheid distress die u de afgelopen week – inclusief vandaag – ervoer?

Extreem veel distress

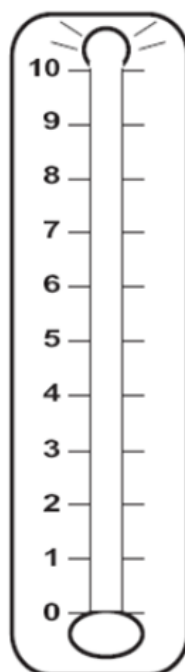

Geen distress

Vervolgens, wilt u voor onderstaande gebieden aangeven of of u de afgelopen week – inclusief vandaag – problemen of moeite gehad hebt met een van de volgende items. Wilt u elke vraag beantwoorden?

| Yes                      | No                       | <u>Praktische problemen</u>                 | Yes                      | No                       | <u>Fysieke problemen</u>        |
|--------------------------|--------------------------|---------------------------------------------|--------------------------|--------------------------|---------------------------------|
| <input type="checkbox"/> | <input type="checkbox"/> | Zorg voor kinderen                          | <input type="checkbox"/> | <input type="checkbox"/> | Uiterlijk                       |
| <input type="checkbox"/> | <input type="checkbox"/> | Wonen/huisvesting                           | <input type="checkbox"/> | <input type="checkbox"/> | Wassen/aan uitkleden            |
| <input type="checkbox"/> | <input type="checkbox"/> | Verzekering/financiën                       | <input type="checkbox"/> | <input type="checkbox"/> | Ademen                          |
| <input type="checkbox"/> | <input type="checkbox"/> | Vervoer                                     | <input type="checkbox"/> | <input type="checkbox"/> | Veranderde urine - uitscheiding |
| <input type="checkbox"/> | <input type="checkbox"/> | Werk/school                                 | <input type="checkbox"/> | <input type="checkbox"/> | Constipatie/verstopping         |
| <input type="checkbox"/> | <input type="checkbox"/> | Therapiekeuzes                              | <input type="checkbox"/> | <input type="checkbox"/> | Diarree                         |
|                          |                          | <u>Familiale problemen</u>                  | <input type="checkbox"/> | <input type="checkbox"/> | Eten                            |
| <input type="checkbox"/> | <input type="checkbox"/> | Omgang met kinderen                         | <input type="checkbox"/> | <input type="checkbox"/> | Moeheid                         |
| <input type="checkbox"/> | <input type="checkbox"/> | Omgang met partner                          | <input type="checkbox"/> | <input type="checkbox"/> | Opgezwollen gevoel              |
| <input type="checkbox"/> | <input type="checkbox"/> | Mogelijkheid om kinderen te hebben          | <input type="checkbox"/> | <input type="checkbox"/> | Koorts                          |
| <input type="checkbox"/> | <input type="checkbox"/> | Familiale gezondheidsproblemen              | <input type="checkbox"/> | <input type="checkbox"/> | Rondwandelen                    |
|                          |                          | <u>Emotionele problemen</u>                 | <input type="checkbox"/> | <input type="checkbox"/> | Spijvertering                   |
| <input type="checkbox"/> | <input type="checkbox"/> | Depressie                                   | <input type="checkbox"/> | <input type="checkbox"/> | Geheugen/concentratie           |
| <input type="checkbox"/> | <input type="checkbox"/> | Angst                                       | <input type="checkbox"/> | <input type="checkbox"/> | Mondzweren                      |
| <input type="checkbox"/> | <input type="checkbox"/> | Nervositeit/zenuwen                         | <input type="checkbox"/> | <input type="checkbox"/> | Misselijkheid                   |
| <input type="checkbox"/> | <input type="checkbox"/> | Bedroefdheid                                | <input type="checkbox"/> | <input type="checkbox"/> | Droge/verstopte neus            |
| <input type="checkbox"/> | <input type="checkbox"/> | Bezorgdheid                                 | <input type="checkbox"/> | <input type="checkbox"/> | Pijn                            |
| <input type="checkbox"/> | <input type="checkbox"/> | Interesseverlies in alledaagse activiteiten | <input type="checkbox"/> | <input type="checkbox"/> | Seksualiteit                    |
| <input type="checkbox"/> | <input type="checkbox"/> | <u>Religieuze/spirituele problemen</u>      | <input type="checkbox"/> | <input type="checkbox"/> | Droge/jeukerige huid            |
|                          |                          |                                             | <input type="checkbox"/> | <input type="checkbox"/> | Slaap                           |
|                          |                          |                                             | <input type="checkbox"/> | <input type="checkbox"/> | Middelenmisbruik                |
|                          |                          |                                             | <input type="checkbox"/> | <input type="checkbox"/> | Tintelingen in handen/voeten    |

Andere problemen:

---

→ French version

Les instructions: entourer d'abord le numéro (0-10) qui correspond le mieux avec le niveau de stress que vous avez expérimenté la semaine passée – aujourd'hui inclus?

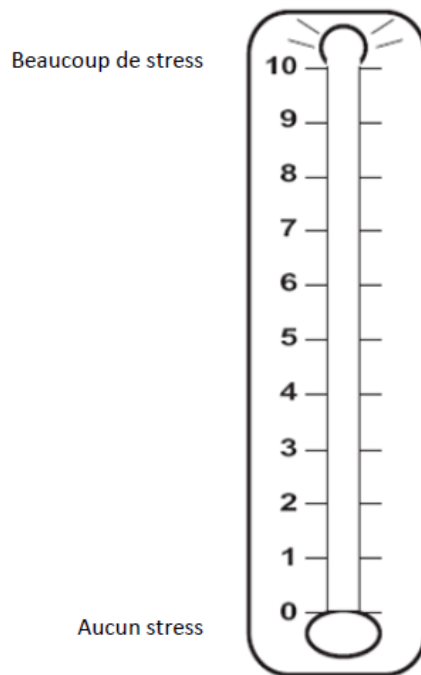

Ensuite, indiquez les éléments avec lesquelles vous avez expérimenté des problèmes la semaine passée – aujourd'hui inclus ? Veuillez s-il-vous-plaît répondre à chaque élément ?

- | <u>Oui</u>            | <u>Non</u>            | <u>Problèmes pratiques</u>                        | <u>Oui</u>            | <u>Non</u>            | <u>Problèmes physiques</u>             |
|-----------------------|-----------------------|---------------------------------------------------|-----------------------|-----------------------|----------------------------------------|
| <input type="radio"/> | <input type="radio"/> | Les soins des enfants                             | <input type="radio"/> | <input type="radio"/> | L'apparence                            |
| <input type="radio"/> | <input type="radio"/> | La habitation                                     | <input type="radio"/> | <input type="radio"/> | Se laver/s'habiller                    |
| <input type="radio"/> | <input type="radio"/> | L'assurance/les finances                          | <input type="radio"/> | <input type="radio"/> | Respirer                               |
| <input type="radio"/> | <input type="radio"/> | Le transport                                      | <input type="radio"/> | <input type="radio"/> | Un changement de la sécrétion urinaire |
| <input type="radio"/> | <input type="radio"/> | Le travail/l'école                                | <input type="radio"/> | <input type="radio"/> | La constipation                        |
| <input type="radio"/> | <input type="radio"/> | Les choix des thérapies                           | <input type="radio"/> | <input type="radio"/> | Le diarrhée                            |
| <u>Oui</u>            | <u>Non</u>            | <u>Problèmes familiales</u>                       | <input type="radio"/> | <input type="radio"/> | Le manger                              |
| <input type="radio"/> | <input type="radio"/> | Le contact avec les enfants                       | <input type="radio"/> | <input type="radio"/> | La fatigue                             |
| <input type="radio"/> | <input type="radio"/> | Le contact avec le/la compagnon/compagne          | <input type="radio"/> | <input type="radio"/> | Se sentir gonflé                       |
| <input type="radio"/> | <input type="radio"/> | La possibilité d'avoir des enfants                | <input type="radio"/> | <input type="radio"/> | La fièvre                              |
| <input type="radio"/> | <input type="radio"/> | Des problèmes de santé familiales                 | <input type="radio"/> | <input type="radio"/> | Marcher                                |
| <u>Oui</u>            | <u>Non</u>            | <u>Des problèmes émotionnelles</u>                | <input type="radio"/> | <input type="radio"/> | La mémoire ou la concentration         |
| <input type="radio"/> | <input type="radio"/> | Le dépression                                     | <input type="radio"/> | <input type="radio"/> | La nausée                              |
| <input type="radio"/> | <input type="radio"/> | La peur                                           | <input type="radio"/> | <input type="radio"/> | Un nez bouché/sec                      |
| <input type="radio"/> | <input type="radio"/> | De la nervosité                                   | <input type="radio"/> | <input type="radio"/> | La douleur                             |
| <input type="radio"/> | <input type="radio"/> | La tristesse                                      | <input type="radio"/> | <input type="radio"/> | La sexualité                           |
| <input type="radio"/> | <input type="radio"/> | La peine                                          | <input type="radio"/> | <input type="radio"/> | Un peu sec/qui démange                 |
| <input type="radio"/> | <input type="radio"/> | Un perte d'intéresse à des activités quotidiennes | <input type="radio"/> | <input type="radio"/> | La sommeil                             |
| <input type="radio"/> | <input type="radio"/> | Des problèmes religieuses/sprituelles             | <input type="radio"/> | <input type="radio"/> | L'abuse des médicaments/l'alcool       |
|                       |                       |                                                   | <input type="radio"/> | <input type="radio"/> | L'onglées des mains/pieds              |

Autres problèmes :

---



---



---

## Appendix 4. Beck Depression Inventory (Dutch and French version)

→ Dutch version

# BDI-II-NL

BDI® - II, Aaron T. Beck. BDI® - II - NL, A.J. Willem van der Does.

Naam: \_\_\_\_\_ Burg.staat: \_\_\_\_\_ Datum: \_\_\_\_\_

Beroep: \_\_\_\_\_ Opleiding: \_\_\_\_\_ Leeftijd: \_\_\_\_\_ Geslacht: \_\_\_\_\_

Instructies: Deze vragenlijst bestaat uit 21 rijtjes uitspraken. Lees a.u.b. ieder rijtje aandachtig en kies uit elk rijtje één uitspraak, die het best beschrijft hoe u zich de afgelopen twee weken met vandaag erbij gevoeld heeft. Kruis het hokje aan met het cijfer vóór de door u gekozen uitspraak. Als meerdere uitspraken in een rijtje even goed van toepassing zijn, kruis dan het hokje aan met het hoogste cijfer van dat rijtje. Let er op dat u niet meer dan één uitspraak per rijtje kiest, ook bij vraag 16 (Veranderingen in Slaappatroon) en 18 (Veranderingen in Eetlust).

|                                                                                                                                                                                                                                                                                                                                                                                                                                                                                                                                                                                                                                                                                                                                                                                                                                                                                                                                                                                                                                                                                                                                                                                                                                                                                                                                                                                                                                                                                                                                                                                                                                                                                                                                                                                                                                                                                                                                              |                                                                                                                                                                                                                                                                                                                                                                                                                                                                                                                                                                                                                                                                                                                                                                                                                                                                                                                                                                                                                                                                                                                                                                                                                                                                                                                                                                                                                                                                                                                                                                                                                                                                                                                                                                                       |
|----------------------------------------------------------------------------------------------------------------------------------------------------------------------------------------------------------------------------------------------------------------------------------------------------------------------------------------------------------------------------------------------------------------------------------------------------------------------------------------------------------------------------------------------------------------------------------------------------------------------------------------------------------------------------------------------------------------------------------------------------------------------------------------------------------------------------------------------------------------------------------------------------------------------------------------------------------------------------------------------------------------------------------------------------------------------------------------------------------------------------------------------------------------------------------------------------------------------------------------------------------------------------------------------------------------------------------------------------------------------------------------------------------------------------------------------------------------------------------------------------------------------------------------------------------------------------------------------------------------------------------------------------------------------------------------------------------------------------------------------------------------------------------------------------------------------------------------------------------------------------------------------------------------------------------------------|---------------------------------------------------------------------------------------------------------------------------------------------------------------------------------------------------------------------------------------------------------------------------------------------------------------------------------------------------------------------------------------------------------------------------------------------------------------------------------------------------------------------------------------------------------------------------------------------------------------------------------------------------------------------------------------------------------------------------------------------------------------------------------------------------------------------------------------------------------------------------------------------------------------------------------------------------------------------------------------------------------------------------------------------------------------------------------------------------------------------------------------------------------------------------------------------------------------------------------------------------------------------------------------------------------------------------------------------------------------------------------------------------------------------------------------------------------------------------------------------------------------------------------------------------------------------------------------------------------------------------------------------------------------------------------------------------------------------------------------------------------------------------------------|
| <p><b>1. Somberheid, verdriet</b></p> <p><input type="checkbox"/> 0 Ik voel me niet somber.</p> <p><input type="checkbox"/> 1 Ik voel me een groot deel van de tijd somber.</p> <p><input type="checkbox"/> 2 Ik ben de hele tijd somber.</p> <p><input type="checkbox"/> 3 Ik ben zó somber of ongelukkig dat ik het niet verdragen kan.</p> <p><b>2. Pessimisme</b></p> <p><input type="checkbox"/> 0 Ik ben niet ontmoedigd over mijn toekomst.</p> <p><input type="checkbox"/> 1 Ik ben meer ontmoedigd over mijn toekomst dan vroeger.</p> <p><input type="checkbox"/> 2 Ik verwacht niet dat de dingen goed voor mij zullen uitpakken.</p> <p><input type="checkbox"/> 3 Ik heb het gevoel dat mijn toekomst hopeloos is en dat het alleen maar erger zal worden.</p> <p><b>3. Mislukkingen</b></p> <p><input type="checkbox"/> 0 Ik voel me geen mislukking.</p> <p><input type="checkbox"/> 1 Ik heb te veel dingen laten mislukken.</p> <p><input type="checkbox"/> 2 Als ik terugkijk, zie ik een hoop mislukkingen.</p> <p><input type="checkbox"/> 3 Ik vind dat ik als persoon een totale mislukking ben.</p> <p><b>4. Verlies van plezier</b></p> <p><input type="checkbox"/> 0 Ik beleeft net zo veel plezier als altijd aan de dingen die ik leuk vind.</p> <p><input type="checkbox"/> 1 Ik geniet niet meer zoveel van dingen als vroeger.</p> <p><input type="checkbox"/> 2 Ik beleeft heel weinig plezier aan de dingen die ik vroeger leuk vond.</p> <p><input type="checkbox"/> 3 Ik beleeft geen enkel plezier aan de dingen die ik vroeger leuk vond.</p> <p><b>5. Schuldgevoelens</b></p> <p><input type="checkbox"/> 0 Ik voel me niet bijzonder schuldig.</p> <p><input type="checkbox"/> 1 Ik voel me schuldig over veel dingen die ik heb gedaan of had moeten doen.</p> <p><input type="checkbox"/> 2 Ik voel me meestal erg schuldig.</p> <p><input type="checkbox"/> 3 Ik voel me de hele tijd schuldig.</p> | <p><b>6. Gevoel gestraft te worden</b></p> <p><input type="checkbox"/> 0 Ik heb niet het gevoel dat ik gestraft word.</p> <p><input type="checkbox"/> 1 Ik heb het gevoel dat ik misschien gestraft zal worden.</p> <p><input type="checkbox"/> 2 Ik verwacht gestraft te worden.</p> <p><input type="checkbox"/> 3 Ik heb het gevoel dat ik nu gestraft word.</p> <p><b>7. Afkeer van zichzelf</b></p> <p><input type="checkbox"/> 0 Ik voel me over mezelf net als altijd.</p> <p><input type="checkbox"/> 1 Ik heb minder zelfvertrouwen.</p> <p><input type="checkbox"/> 2 Ik ben teleurgesteld in mezelf.</p> <p><input type="checkbox"/> 3 Ik heb een hekel aan mezelf.</p> <p><b>8. Zelfcritiek</b></p> <p><input type="checkbox"/> 0 Ik bekritiseer of verwijt mijzelf niet meer dan gewoonlijk.</p> <p><input type="checkbox"/> 1 Ik ben meer kritisch op mezelf dan vroeger.</p> <p><input type="checkbox"/> 2 Ik bekritiseer mezelf voor al mijn tekortkomingen.</p> <p><input type="checkbox"/> 3 Ik verwijt mijzelf al het slechte wat gebeurt.</p> <p><b>9. Suïcidale gedachten of wensen</b></p> <p><input type="checkbox"/> 0 Ik heb geen enkele gedachte aan zelfdoding.</p> <p><input type="checkbox"/> 1 Ik heb gedachten aan zelfdoding, maar ik zou ze niet ten uitvoer brengen.</p> <p><input type="checkbox"/> 2 Ik zou liever een eind aan mijn leven maken.</p> <p><input type="checkbox"/> 3 Ik zou een eind aan mijn leven maken als ik de kans kreeg.</p> <p><b>10. Huilen</b></p> <p><input type="checkbox"/> 0 Ik huil niet meer dan vroeger.</p> <p><input type="checkbox"/> 1 Ik huil meer dan vroeger.</p> <p><input type="checkbox"/> 2 Ik huil om elk klein ding.</p> <p><input type="checkbox"/> 3 Ik wil graag huilen, maar ik kan het niet.</p> |
|----------------------------------------------------------------------------------------------------------------------------------------------------------------------------------------------------------------------------------------------------------------------------------------------------------------------------------------------------------------------------------------------------------------------------------------------------------------------------------------------------------------------------------------------------------------------------------------------------------------------------------------------------------------------------------------------------------------------------------------------------------------------------------------------------------------------------------------------------------------------------------------------------------------------------------------------------------------------------------------------------------------------------------------------------------------------------------------------------------------------------------------------------------------------------------------------------------------------------------------------------------------------------------------------------------------------------------------------------------------------------------------------------------------------------------------------------------------------------------------------------------------------------------------------------------------------------------------------------------------------------------------------------------------------------------------------------------------------------------------------------------------------------------------------------------------------------------------------------------------------------------------------------------------------------------------------|---------------------------------------------------------------------------------------------------------------------------------------------------------------------------------------------------------------------------------------------------------------------------------------------------------------------------------------------------------------------------------------------------------------------------------------------------------------------------------------------------------------------------------------------------------------------------------------------------------------------------------------------------------------------------------------------------------------------------------------------------------------------------------------------------------------------------------------------------------------------------------------------------------------------------------------------------------------------------------------------------------------------------------------------------------------------------------------------------------------------------------------------------------------------------------------------------------------------------------------------------------------------------------------------------------------------------------------------------------------------------------------------------------------------------------------------------------------------------------------------------------------------------------------------------------------------------------------------------------------------------------------------------------------------------------------------------------------------------------------------------------------------------------------|

Ga verder op de achterkant.

|  |                  |
|--|------------------|
|  | Subtotaal pag. 1 |
|--|------------------|

Translated and adapted by permission. Copyright 1987 Aaron T. Beck. Dutch translation copyright 2002 by Aaron T. Beck. Adapted, translated and reproduced by permission of Publisher, Pearson Assessment and Information B.V. All rights reserved. Produced in the Netherlands Pearson Assessment and Information B.V. Op dit formulier berusten auteursrechten. Het formulier is daarom gedrukt in verschillende blauwtinten. Elke andere vorm of kleur is niet officieel en illegaal. 11/3711.01 [www.pearson-nl.com](http://www.pearson-nl.com)



# BDI-II-NL

## 11. Agitatie, onrust

- 0 Ik ben niet rustelozter of meer gespannen dan anders.
- 1 Ik ben rustelozter of meer gespannen dan anders.
- 2 Ik ben zo rusteloos of opgewonden dat ik moeilijk stil kan zitten.
- 3 Ik ben zo rusteloos of opgewonden dat ik moet blijven bewegen of iets doen.

## 12. Verlies van interesse

- 0 Mijn belangstelling voor andere mensen of activiteiten is niet verminderd.
- 1 Ik heb nu minder belangstelling voor andere mensen of dingen dan vroeger.
- 2 Ik heb mijn belangstelling voor andere mensen of dingen grotendeels verloren.
- 3 Het is moeilijk om nog ergens belangstelling voor op te brengen.

## 13. Besluiteloosheid

- 0 Ik neem beslissingen ongeveer even makkelijk als altijd.
- 1 Ik vind het moeilijker om beslissingen te nemen dan gewoonlijk.
- 2 Ik heb veel meer moeite met het nemen van beslissingen dan vroeger.
- 3 Ik heb moeite met alle beslissingen.

## 14. Waardeloosheid

- 0 Ik heb niet het gevoel dat ik waardeloos ben.
- 1 Ik zie mezelf niet meer zo waardevol en nuttig als vroeger.
- 2 Vergelijken met anderen voel ik me meer waardeloos.
- 3 Ik voel me volstrekt waardeloos.

## 15. Energieverlies

- 0 Ik heb nog evenveel energie als altijd.
- 1 Ik heb minder energie dan vroeger.
- 2 Ik heb niet voldoende energie om veel te doen.
- 3 Ik heb niet genoeg energie om wat dan ook te doen.

## 16. Verandering van slaappatroon

- 0 Mijn slaappatroon is niet veranderd.
- 1a Ik slaap wat meer dan gewoonlijk.
- 1b Ik slaap wat minder dan gewoonlijk.
- 2a Ik slaap veel meer dan gewoonlijk.
- 2b Ik slaap veel minder dan gewoonlijk.
- 3a Ik slaap het grootste deel van de dag.
- 3b Ik word 1 - 2 uren te vroeg wakker en kan niet meer inslapen.

## 17. Prikkelbaarheid

- 0 Ik ben niet meer prikkelbaar dan anders.
- 1 Ik ben meer prikkelbaar dan anders.
- 2 Ik ben veel meer prikkelbaar dan anders.
- 3 Ik ben de hele tijd prikkelbaar.

## 18. Verandering van eetlust

- 0 Mijn eetlust is niet veranderd.
- 1a Mijn eetlust is wat kleiner dan gewoonlijk.
- 1b Mijn eetlust is wat groter dan gewoonlijk.
- 2a Mijn eetlust is veel kleiner dan vroeger.
- 2b Mijn eetlust is veel groter dan gewoonlijk.
- 3a Ik heb helemaal geen eetlust.
- 3b Ik verlang de hele tijd naar eten.

## 19. Concentratieproblemen

- 0 Ik kan me net zo goed concentreren als altijd.
- 1 Ik kan me niet zo goed concentreren als anders.
- 2 Het is lastig om mijn gedachten ergens lang bij te houden.
- 3 Ik kan me nergens op concentreren.

## 20. Moeheid

- 0 Ik ben niet meer moe of afgemat dan gewoonlijk.
- 1 Ik word sneller moe of afgemat dan gewoonlijk.
- 2 Ik ben te moe of afgemat voor veel dingen die ik vroeger wel deed.
- 3 Ik ben te moe of afgemat voor de meeste dingen die ik vroeger wel deed.

## 21. Verlies van interesse in sex

- 0 Ik heb de laatste tijd geen verandering gemerkt in mijn belangstelling voor sex.
- 1 Ik heb minder belangstelling voor sex dan vroeger.
- 2 Ik heb tegenwoordig veel minder belangstelling voor sex.
- 3 Ik heb alle belangstelling voor sex verloren.

Einde van de vragenlijst.

Controleer a.u.b. of alle vragen beantwoord zijn.

|  |                     |
|--|---------------------|
|  | Subtotaal pag. 1    |
|  | Subtotaal pag. 2    |
|  | <b>TOTAAL SCORE</b> |

→ French version

## BDI – II – FR

Instructions : Ce questionnaire se contient de 21 expressions. Lisez s.v.p. chaque phrase attentivement et choisissez la phrase qui correspond le mieux à votre sentiment les 2 semaines passées, aujourd'hui inclus. Mettez une croix dans le cadre qui correspond à votre phrase de votre choix. S'il y a plusieurs phrase qui correspond à votre sentiment, mettez une croix chez la phrase avec la chiffre la plus haute. Faites attention que vous ne croissiez plus d'une phrase, même chez les expressions 16 (Changements dans le sommeil) et 18 (Changements dans l'appétit).

**1. Tristesse**

|                          |                                                                  |
|--------------------------|------------------------------------------------------------------|
| <input type="checkbox"/> | Je ne me sens pas triste.                                        |
| <input type="checkbox"/> | Je me sens triste la plupart du temps.                           |
| <input type="checkbox"/> | Je me sens constamment triste.                                   |
| <input type="checkbox"/> | Je suis si triste ou malheureux(se) que je ne peux le supporter. |

**2. Pessimisme**

|                          |                                                                  |
|--------------------------|------------------------------------------------------------------|
| <input type="checkbox"/> | Je ne me sens pas découragé(e) concernant l'avenir.              |
| <input type="checkbox"/> | Je me sens plus découragé(e) concernant l'avenir que d'habitude. |
| <input type="checkbox"/> | Je ne m'attends pas à ce que les choses fonctionnent pour moi.   |
| <input type="checkbox"/> | Je sens que l'avenir est sans espoir et ne fera qu'empirer.      |

**3. Sentiment d'échec**

|                          |                                                              |
|--------------------------|--------------------------------------------------------------|
| <input type="checkbox"/> | Je n'ai pas l'impression d'être une(e) raté(e).              |
| <input type="checkbox"/> | J'ai échoué plus que j'aurais dû.                            |
| <input type="checkbox"/> | Lorsque je pense à ma vie passée, je vois beaucoup d'échecs. |
| <input type="checkbox"/> | Je sens que je suis un(e) raté(e).                           |

**4. Perte de plaisir**

|                          |                                                                   |
|--------------------------|-------------------------------------------------------------------|
| <input type="checkbox"/> | Je retire autant de plaisir que d'habitude des choses que j'aime. |
| <input type="checkbox"/> | Je ne ressens pas autant de plaisir que d'habitude.               |
| <input type="checkbox"/> | Je retire très peu de plaisir des choses que j'aimais.            |
| <input type="checkbox"/> | Je ne retire aucun plaisir des choses que j'aimais.               |

**5. Sentiments de culpabilité**

|                          |                                                                             |
|--------------------------|-----------------------------------------------------------------------------|
| <input type="checkbox"/> | Je ne me sens pas particulièrement coupable.                                |
| <input type="checkbox"/> | Je me sens coupable de plusieurs choses que j'ai faites ou aurais dû faire. |
| <input type="checkbox"/> | Je me sens vraiment très coupable la plupart du temps.                      |
| <input type="checkbox"/> | Je me sens constamment coupable.                                            |

**6. Sentiments de punition**

|                          |                                          |
|--------------------------|------------------------------------------|
| <input type="checkbox"/> | Je n'ai pas l'impression d'être puni(e). |
| <input type="checkbox"/> | Je sens que je peux être puni(e).        |
| <input type="checkbox"/> | Je m'attends à être puni(e).             |

|  |                              |
|--|------------------------------|
|  | Je sens que je suis puni(e). |
|--|------------------------------|

### 7. Baisse d'estime de soi

|  |                                                              |
|--|--------------------------------------------------------------|
|  | J'ai les mêmes sentiments vis-à-vis moi-même que d'habitude. |
|  | Je perdu confiance en moi.                                   |
|  | Je suis déçu(e) de moi-même.                                 |
|  | Je ne m'aime pas.                                            |

### 8. Autocritique

|  |                                                             |
|--|-------------------------------------------------------------|
|  | Je ne me critique ou ne me blâme pas plus que d'habitude.   |
|  | Je suis plus critique à l'égard de moi-même que d'habitude. |
|  | Je me critique pour toutes mes fautes.                      |
|  | Je me blâme pour tout ce qui arrive de mauvais.             |

### 9. Pensées suicidaires

|  |                                                          |
|--|----------------------------------------------------------|
|  | Je n'ai aucune pensée suicidaire.                        |
|  | Je pense parfois à me suicider, mais je ne le ferai pas. |
|  | J'aimerais me suicider.                                  |
|  | Je me suiciderais si j'en avais la possibilité.          |

### 10. Pleurs

|  |                                              |
|--|----------------------------------------------|
|  | Je ne pleure pas plus que d'habitude.        |
|  | Je pleure plus que d'habitude.               |
|  | Je pleure pour la moindre des choses.        |
|  | J'ai le goût de pleurer mais je ne peux pas. |

### 11. Agitation

|  |                                                                                     |
|--|-------------------------------------------------------------------------------------|
|  | Je ne suis pas plus agité(e) ou activé(e) que d'habitude.                           |
|  | Je suis plus agité(e) ou activé(e) que d'habitude.                                  |
|  | Je suis si agité(e) qu'il est difficile de rester tranquille.                       |
|  | Je suis si agité(e) que je ne dois pas arrêter de bouger ou de faire quelque chose. |

### 12. Perte d'intérêt

|  |                                                                                |
|--|--------------------------------------------------------------------------------|
|  | Je n'ai pas perdu mon intérêt pour les autres ou pour les activités.           |
|  | Je suis moins intéressé(e) par les autres ou quoi que ce soit qu'avant.        |
|  | J'ai perdu une grande part de mon intérêt pour les autres ou quoi que ce soit. |
|  | Il m'est difficile de m'intéresser à quoi que ce soit.                         |

### 13. Indécision

|  |                                                                       |
|--|-----------------------------------------------------------------------|
|  | Je prends mes décisions aussi bien qu'avant.                          |
|  | Je trouve qu'il est plus difficile de prendre des décisions qu'avant. |

|  |                                                                     |
|--|---------------------------------------------------------------------|
|  | J'ai beaucoup plus de difficultés à prendre des décisions qu'avant. |
|  | J'ai de la difficulté à prendre des décisions.                      |

**14. Autodépréciation**

|  |                                                                                    |
|--|------------------------------------------------------------------------------------|
|  | Je ne sens pas que je n'ai pas de valeur.                                          |
|  | Je ne me considère pas comme ayant autant de valeur et étant aussi utile qu'avant. |
|  | Je me sens comme ayant moins de valeur comparativement aux autres personnes.       |
|  | Je me sens sans valeur.                                                            |

**15. Perte d'énergie**

|  |                                                          |
|--|----------------------------------------------------------|
|  | J'ai autant d'énergie qu'avant.                          |
|  | J'ai moins d'énergie que j'ai l'habitude d'avoir.        |
|  | Je n'ai pas d'énergie pour faire grand-chose.            |
|  | Je n'ai pas assez d'énergie pour faire quoi que ce soit. |

**16. Changements dans le sommeil**

|  |                                                                                                                  |
|--|------------------------------------------------------------------------------------------------------------------|
|  | Mon sommeil n'a pas changé.                                                                                      |
|  | Je dors un peu plus ou un peu moins que d'habitude.                                                              |
|  | Je dors beaucoup plus ou beaucoup moins que d'habitude.                                                          |
|  | Je dors la plus grande partie de la journée ou je me réveille 1 ou 2 heures plus tôt et je ne peux me rendormir. |

**17. Irritabilité**

|  |                                                 |
|--|-------------------------------------------------|
|  | Je ne me sens pas irritable que d'habitude.     |
|  | Je suis plus irritable que d'habitude.          |
|  | Je suis beaucoup plus irritable que d'habitude. |
|  | Je suis toujours irritable.                     |

**18. Changements dans l'appétit**

|  |                                                                             |
|--|-----------------------------------------------------------------------------|
|  | Mon appétit n'a pas changé.                                                 |
|  | Mon appétit est moins grand ou plus grand que d'habitude.                   |
|  | Mon appétit est beaucoup moins grand ou beaucoup plus grand que d'habitude. |
|  | Je n'ai plus d'appétit du tout ou je pense toujours à manger.               |

**19. Difficulté de concentration**

|  |                                                               |
|--|---------------------------------------------------------------|
|  | Je peux me concentrer aussi bien qu'auparavant.               |
|  | Je ne peux me concentrer aussi bien qu'auparavant.            |
|  | Je ne peux me concentrer sur quoi que ce soit très longtemps. |
|  | Je trouve que je ne peux me concentrer sur quoi que ce soit.  |

**20. Fatigue**

|  |                                                                                           |
|--|-------------------------------------------------------------------------------------------|
|  | Je ne suis pas plus fatigué(e) que d'habitude.                                            |
|  | Je deviens plus fatigué(e) plus facilement que d'habitude.                                |
|  | Je suis trop fatigué(e) pour faire plusieurs choses que j'avais l'habitude de faire.      |
|  | Je suis trop fatigué(e) pour faire la plupart des choses que j'avais l'habitude de faire. |

**21. Perte de libido**

|  |                                                                                 |
|--|---------------------------------------------------------------------------------|
|  | Je n'ai pas remarqué de changements récents dans mon intérêt pour la sexualité. |
|  | Je m'intéresse moins à la sexualité qu'avant.                                   |
|  | Je m'intéresse beaucoup moins à la sexualité.                                   |
|  | J'ai perdu tout intérêt pour la sexualité.                                      |

## Appendix 5. Functional Assessment of Chronic Illness Therapy – Fatigue Subscale (Version 4) (Dutch and French version)

→ Dutch version

### FACIT-Fatigue Scale (Version 4)

Hieronder vindt u een lijst met uitspraken die andere mensen, met dezelfde ziekte als u, belangrijk vonden. **Omcirkel of duid a.u.b. één cijfer per regel aan om uw antwoord zoals het tijdens de afgelopen 7 dagen van toepassing was aan te geven.**

|          |                                                                                     | Hele-<br>maal<br>niet            | Een<br>beetje | Enigs-<br>zins | In vrij<br>hoge<br>mate | In zeer<br>hoge<br>mate |
|----------|-------------------------------------------------------------------------------------|----------------------------------|---------------|----------------|-------------------------|-------------------------|
|          |                                                                                     | <b>v a n t o e p a s s i n g</b> |               |                |                         |                         |
| HI7      | Ik voel me vermoeid.....                                                            | 0                                | 1             | 2              | 3                       | 4                       |
| HI<br>12 | Ik voel me slap over mijn hele lichaam.....                                         | 0                                | 1             | 2              | 3                       | 4                       |
| Aa1      | Ik voel me lusteloos (futloos).....                                                 | 0                                | 1             | 2              | 3                       | 4                       |
| Aa2      | Ik voel me moe.....                                                                 | 0                                | 1             | 2              | 3                       | 4                       |
| Aa3      | Het kost me moeite om met dingen te <u>beginnen</u> omdat ik zo moe ben.....        | 0                                | 1             | 2              | 3                       | 4                       |
| Aa4      | Het kost me moeite om dingen <u>af</u> te <u>maken</u> omdat ik zo moe ben.....     | 0                                | 1             | 2              | 3                       | 4                       |
| Aa5      | Ik voel me energiek.....                                                            | 0                                | 1             | 2              | 3                       | 4                       |
| Aa7      | Ik ben in staat om mijn gewone activiteiten te doen.....                            | 0                                | 1             | 2              | 3                       | 4                       |
| Aa8      | Ik heb behoefte aan slaap overdag.....                                              | 0                                | 1             | 2              | 3                       | 4                       |
| Aa<br>12 | Ik ben te moe om te eten.....                                                       | 0                                | 1             | 2              | 3                       | 4                       |
| Aa<br>14 | Ik heb hulp nodig bij het doen van mijn gebruikelijke activiteiten.....             | 0                                | 1             | 2              | 3                       | 4                       |
| Aa<br>15 | Ik vind het frustrerend dat ik te moe ben om de dingen te doen die ik wil doen..... | 0                                | 1             | 2              | 3                       | 4                       |
| Aa<br>16 | Ik moet mijn sociale activiteiten beperken omdat ik moe ben.....                    | 0                                | 1             | 2              | 3                       | 4                       |

→ French version

**Échelle FACIT d'évaluation de la fatigue (Version 4)**

Vous trouverez ci-dessous une liste de commentaires que d'autres personnes atteintes de la même maladie que vous ont jugés importants. **Veillez indiquer votre réponse en entourant un seul chiffre par ligne et en tenant compte des 7 derniers jours.**

|          |                                                                                     | Pas du<br>tout | Un<br>peu | Moyen-<br>nement | Beau-<br>coup | Énormé-<br>ment |
|----------|-------------------------------------------------------------------------------------|----------------|-----------|------------------|---------------|-----------------|
| HI7      | Je me sens épuisé(e) .....                                                          | 0              | 1         | 2                | 3             | 4               |
| HI<br>12 | Je ressens une faiblesse générale.....                                              | 0              | 1         | 2                | 3             | 4               |
| An1      | Je suis sans énergie [lessivé(e)] .....                                             | 0              | 1         | 2                | 3             | 4               |
| An2      | Je me sens fatigué(e) .....                                                         | 0              | 1         | 2                | 3             | 4               |
| An3      | J'ai du mal à <u>commencer</u> les choses parce que je suis<br>fatigué(e) .....     | 0              | 1         | 2                | 3             | 4               |
| An4      | J'ai du mal à <u>terminer</u> les choses parce que je suis<br>fatigué(e).....       | 0              | 1         | 2                | 3             | 4               |
| An5      | J'ai de l'énergie .....                                                             | 0              | 1         | 2                | 3             | 4               |
| An7      | Je suis capable de faire ce que je fais d'habitude.....                             | 0              | 1         | 2                | 3             | 4               |
| An8      | J'ai besoin de dormir dans la journée .....                                         | 0              | 1         | 2                | 3             | 4               |
| An<br>12 | Je suis trop fatigué(e) pour manger .....                                           | 0              | 1         | 2                | 3             | 4               |
| An<br>14 | J'ai besoin d'aide pour faire mes activités habituelles ...                         | 0              | 1         | 2                | 3             | 4               |
| An<br>15 | Je suis frustré(e) d'être trop fatigué(e) pour pouvoir<br>faire ce que je veux..... | 0              | 1         | 2                | 3             | 4               |
| An<br>16 | Je dois limiter mes activités sociales parce que je suis<br>fatigué(e) .....        | 0              | 1         | 2                | 3             | 4               |

## Appendix 6. EORTC QLQ-C30 (Dutch and French version)

→ Dutch version

DUTCH

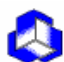

### EORTC QLQ-C30 (version 3)

Wij zijn geïnteresseerd in bepaalde dingen over u en uw gezondheid. Wilt u alle vragen zelf beantwoorden door het getal te omcirkelen dat het meest op u van toepassing is. Er zijn geen "juiste" of "onjuiste" antwoorden. De informatie die u geeft zal strikt vertrouwelijk worden behandeld.

Wilt u uw initialen invullen:

|  |  |  |  |  |
|--|--|--|--|--|
|  |  |  |  |  |
|--|--|--|--|--|

Uw geboortedatum (Dag, Maand, Jaar):

|  |  |  |  |  |  |  |  |  |  |
|--|--|--|--|--|--|--|--|--|--|
|  |  |  |  |  |  |  |  |  |  |
|--|--|--|--|--|--|--|--|--|--|

De datum van vandaag (Dag, Maand, Jaar):

31

|  |  |  |  |  |  |  |  |  |  |
|--|--|--|--|--|--|--|--|--|--|
|  |  |  |  |  |  |  |  |  |  |
|--|--|--|--|--|--|--|--|--|--|

|                                                                                                                           | Helemaal<br>niet | Een<br>beetje | Nogal | Heel<br>erg |
|---------------------------------------------------------------------------------------------------------------------------|------------------|---------------|-------|-------------|
| 1. Heeft u moeite met het doen van inspannende activiteiten zoals het dragen van een zware boodschappentas of een koffer? | 1                | 2             | 3     | 4           |
| 2. Heeft u moeite met het maken van een <u>lange</u> wandeling?                                                           | 1                | 2             | 3     | 4           |
| 3. Heeft u moeite met het maken van een <u> korte</u> wandeling buitenshuis?                                              | 1                | 2             | 3     | 4           |
| 4. Moet u overdag in bed of op een stoel blijven?                                                                         | 1                | 2             | 3     | 4           |
| 5. Heeft u hulp nodig met eten, aankleden, uzelf wassen of naar het toilet gaan?                                          | 1                | 2             | 3     | 4           |

#### Gedurende de afgelopen week:

|                                                                                                         | Helemaal<br>niet | Een<br>beetje | Nogal | Heel<br>erg |
|---------------------------------------------------------------------------------------------------------|------------------|---------------|-------|-------------|
| 6. Was u beperkt bij het doen van uw werk of andere dagelijkse bezigheden?                              | 1                | 2             | 3     | 4           |
| 7. Was u beperkt in het uitoefenen van uw hobby's of bij andere bezigheden die u in uw vrije tijd doet? | 1                | 2             | 3     | 4           |
| 8. Was u kortademig?                                                                                    | 1                | 2             | 3     | 4           |
| 9. Heeft u pijn gehad?                                                                                  | 1                | 2             | 3     | 4           |
| 10. Had u behoefte om te rusten?                                                                        | 1                | 2             | 3     | 4           |
| 11. Heeft u moeite met slapen gehad?                                                                    | 1                | 2             | 3     | 4           |
| 12. Heeft u zich slap gevoeld?                                                                          | 1                | 2             | 3     | 4           |
| 13. Heeft u gebrek aan eetlust gehad?                                                                   | 1                | 2             | 3     | 4           |
| 14. Heeft u zich misselijk gevoeld?                                                                     | 1                | 2             | 3     | 4           |

Wilt u a.u.b. naar de volgende bladzijde gaan



DUTCH

**Gedurende de afgelopen week:**

|                                                                                                           | Helemaal<br>niet | Een<br>beetje | Nogal | Heel<br>erg |
|-----------------------------------------------------------------------------------------------------------|------------------|---------------|-------|-------------|
| 15. Heeft u overgegeven?                                                                                  | 1                | 2             | 3     | 4           |
| 16. Had u last van obstipatie? (was u verstopt?)                                                          | 1                | 2             | 3     | 4           |
| 17. Had u diarree?                                                                                        | 1                | 2             | 3     | 4           |
| 18. Was u moe?                                                                                            | 1                | 2             | 3     | 4           |
| 19. Heeft pijn u gehinderd in uw dagelijkse bezigheden?                                                   | 1                | 2             | 3     | 4           |
| 20. Heeft u moeite gehad met het concentreren op dingen, zoals een krant lezen of televisie kijken?       | 1                | 2             | 3     | 4           |
| 21. Voelde u zich gespannen?                                                                              | 1                | 2             | 3     | 4           |
| 22. Maakte u zich zorgen?                                                                                 | 1                | 2             | 3     | 4           |
| 23. Voelde u zich prikkelbaar?                                                                            | 1                | 2             | 3     | 4           |
| 24. Voelde u zich neerslachtig?                                                                           | 1                | 2             | 3     | 4           |
| 25. Heeft u moeite gehad met het herinneren van dingen?                                                   | 1                | 2             | 3     | 4           |
| 26. Heeft uw lichamelijke toestand of medische behandeling uw <u>familieleven</u> in de weg gestaan?      | 1                | 2             | 3     | 4           |
| 27. Heeft uw lichamelijke toestand of medische behandeling u belemmerd in uw <u>sociale</u> bezigheden?   | 1                | 2             | 3     | 4           |
| 28. Heeft uw lichamelijke toestand of medische behandeling financiële moeilijkheden met zich meegebracht? | 1                | 2             | 3     | 4           |

**Wilt u voor de volgende vragen het getal tussen 1 en 7 omcirkelen dat het meest op u van toepassing is**29. Hoe zou u uw algehele gezondheid gedurende de afgelopen week beoordelen?

1            2            3            4            5            6            7

Erg slecht

Uitstekend

30. Hoe zou u uw algehele "kwaliteit van het leven" gedurende de afgelopen week beoordelen?

1            2            3            4            5            6            7

Erg slecht

Uitstekend

→ French version

FRENCH NEUTRAL

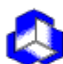

### EORTC QLQ-C30 (version 3)

Nous nous intéressons à vous et à votre santé. Répondez vous-même à toutes les questions en entourant le chiffre qui correspond le mieux à votre situation. Il n'y a pas de "bonne" ou de "mauvaise" réponse. Ces informations sont strictement confidentielles.

*Merci de préciser:*

Vos initiales:

|  |  |  |  |  |  |  |  |  |  |
|--|--|--|--|--|--|--|--|--|--|
|  |  |  |  |  |  |  |  |  |  |
|--|--|--|--|--|--|--|--|--|--|

Date de naissance (jour/mois/année):

|  |  |  |  |  |  |  |  |  |  |  |  |  |  |  |  |  |  |  |  |
|--|--|--|--|--|--|--|--|--|--|--|--|--|--|--|--|--|--|--|--|
|  |  |  |  |  |  |  |  |  |  |  |  |  |  |  |  |  |  |  |  |
|--|--|--|--|--|--|--|--|--|--|--|--|--|--|--|--|--|--|--|--|

La date d'aujourd'hui (jour/mois/année):

|    |  |  |  |  |  |  |  |  |  |  |  |  |  |  |  |  |  |  |  |
|----|--|--|--|--|--|--|--|--|--|--|--|--|--|--|--|--|--|--|--|
| 31 |  |  |  |  |  |  |  |  |  |  |  |  |  |  |  |  |  |  |  |
|----|--|--|--|--|--|--|--|--|--|--|--|--|--|--|--|--|--|--|--|

|                                                                                                                                 | Pas du tout | Un peu | Assez | Beaucoup |
|---------------------------------------------------------------------------------------------------------------------------------|-------------|--------|-------|----------|
| 1. Avez-vous des difficultés à faire certains efforts physiques pénibles comme porter un sac à provisions chargé ou une valise? | 1           | 2      | 3     | 4        |
| 2. Avez-vous des difficultés à faire une <u>longue</u> promenade?                                                               | 1           | 2      | 3     | 4        |
| 3. Avez-vous des difficultés à faire un <u>petit</u> tour dehors?                                                               | 1           | 2      | 3     | 4        |
| 4. Etes-vous obligé(e) de rester au lit ou dans un fauteuil pendant la journée?                                                 | 1           | 2      | 3     | 4        |
| 5. Avez-vous besoin d'aide pour manger, vous habiller, faire votre toilette ou aller aux toilettes?                             | 1           | 2      | 3     | 4        |

#### Au cours de la semaine passée:

|                                                                                       | Pas du tout | Un peu | Assez | Beaucoup |
|---------------------------------------------------------------------------------------|-------------|--------|-------|----------|
| 6. Avez-vous été gêné(e) pour faire votre travail ou vos activités de tous les jours? | 1           | 2      | 3     | 4        |
| 7. Avez-vous été gêné(e) dans vos activités de loisirs?                               | 1           | 2      | 3     | 4        |
| 8. Avez-vous eu le souffle court?                                                     | 1           | 2      | 3     | 4        |
| 9. Avez-vous ressenti de la douleur?                                                  | 1           | 2      | 3     | 4        |
| 10. Avez-vous eu besoin de repos?                                                     | 1           | 2      | 3     | 4        |
| 11. Avez-vous eu des difficultés pour dormir?                                         | 1           | 2      | 3     | 4        |
| 12. Vous êtes-vous senti(e) faible?                                                   | 1           | 2      | 3     | 4        |
| 13. Avez-vous manqué d'appétit?                                                       | 1           | 2      | 3     | 4        |
| 14. Avez-vous eu des nausées (mal au coeur)?                                          | 1           | 2      | 3     | 4        |
| 15. Avez-vous vomi?                                                                   | 1           | 2      | 3     | 4        |

Passez à la page suivante S.V.P.

FRENCH NEUTRAL

| <b>Au cours de la semaine passée:</b>                                                                                                                                | <b>Pas du<br/>tout</b> | <b>Un<br/>peu</b> | <b>Assez</b> | <b>Beaucoup</b> |
|----------------------------------------------------------------------------------------------------------------------------------------------------------------------|------------------------|-------------------|--------------|-----------------|
| 16. Avez-vous été constipé(e)?                                                                                                                                       | 1                      | 2                 | 3            | 4               |
| 17. Avez-vous eu de la diarrhée?                                                                                                                                     | 1                      | 2                 | 3            | 4               |
| 18. Etiez-vous fatigué(e)?                                                                                                                                           | 1                      | 2                 | 3            | 4               |
| 19. Des douleurs ont-elles perturbé vos activités quotidiennes?                                                                                                      | 1                      | 2                 | 3            | 4               |
| 20. Avez-vous eu des difficultés à vous concentrer sur certaines choses, par exemple, pour lire le journal ou regarder la télévision?                                | 1                      | 2                 | 3            | 4               |
| 21. Vous êtes-vous senti(e) tendu(e)?                                                                                                                                | 1                      | 2                 | 3            | 4               |
| 22. Vous êtes-vous fait du souci?                                                                                                                                    | 1                      | 2                 | 3            | 4               |
| 23. Vous êtes-vous senti(e) irritable?                                                                                                                               | 1                      | 2                 | 3            | 4               |
| 24. Vous êtes-vous senti(e) déprimé(e)?                                                                                                                              | 1                      | 2                 | 3            | 4               |
| 25. Avez-vous eu des difficultés pour vous souvenir de certaines choses?                                                                                             | 1                      | 2                 | 3            | 4               |
| 26. Votre état physique ou votre traitement médical vous ont-ils gêné(e) dans votre vie <u>familiale</u> ?                                                           | 1                      | 2                 | 3            | 4               |
| 27. Votre état physique ou votre traitement médical vous ont-ils gêné(e) dans vos activités <u>sociales</u> (par exemple, sortir avec des amis, aller au cinéma...)? | 1                      | 2                 | 3            | 4               |
| 28. Votre état physique ou votre traitement médical vous ont-ils causé des problèmes financiers?                                                                     | 1                      | 2                 | 3            | 4               |

**Pour les questions suivantes, veuillez répondre en entourant le chiffre entre 1 et 7 qui s'applique le mieux à votre situation**

29. Comment évalueriez-vous votre état de santé au cours de la semaine passée?

1            2            3            4            5            6            7

Très mauvais

Excellent

30. Comment évalueriez-vous l'ensemble de votre qualité de vie au cours de la semaine passée?

1            2            3            4            5            6            7

Très mauvais

Excellent

**Appendix 7: EQ-5D (Dutch and French version)**

→ Dutch version

**Kwaliteit van leven (EuroQoL)**

Wilt u bij ieder onderdeel het cijfer omcirkelen in het hokje achter de zin die het beste past bij uw eigen gezondheidstoestand op dit moment?

|                                                                                          |   |
|------------------------------------------------------------------------------------------|---|
| <b>Mobiliteit</b>                                                                        |   |
| Ik heb geen problemen met rondwandelen                                                   | 1 |
| Ik heb enige problemen met rondwandelen                                                  | 2 |
| Ik ben bedlegerig                                                                        | 3 |
| <b>Zelfzorg</b>                                                                          |   |
| Ik heb geen problemen om voor mezelf te zorgen                                           | 1 |
| Ik heb enige problemen om mijzelf te wassen of aan te kleden                             | 2 |
| Ik ben niet in staat om mijzelf te wassen of aan te kleden                               | 3 |
| <b>Dagelijkse activiteiten (bv. Werk, huishouden, gezins- en vrijetijdsactiviteiten)</b> |   |
| Ik heb geen problemen met mijn dagelijkse activiteiten                                   | 1 |
| Ik heb enige problemen met mijn dagelijkse activiteiten                                  | 2 |
| Ik ben niet in staat mijn dagelijkse activiteiten uit te voeren                          | 3 |
| <b>Pijn/klachten</b>                                                                     |   |
| Ik heb geen pijn of andere klachten                                                      | 1 |
| Ik heb matige pijn of andere klachten                                                    | 2 |
| Ik heb zeer ernstige pijn of andere klachten                                             | 3 |
| <b>Angst/depressie</b>                                                                   |   |
| Ik ben niet angstig of depressief                                                        | 1 |
| Ik ben matig angstig of depressief                                                       | 2 |
| Ik ben erg angstig of depressief                                                         | 3 |

Om mensen te helpen bij het aangeven hoe goed of hoe slecht een gezondheidstoestand is, hebben we een meetschaal (te vergelijken met een thermometer) gemaakt. Op de meetschaal hiernaast betekent "100" de beste gezondheidstoestand die u zich kunt voorstellen, en "0" de slechtste gezondheidstoestand die u zich kunt voorstellen.

We willen u vragen op deze meetschaal aan te geven hoe goed of hoe slecht volgens u uw eigen gezondheidstoestand vandaag is. Trek een lijn op de meetschaal dat volgens u aangeeft hoe goed of hoe slecht uw gezondheidstoestand vandaag is.

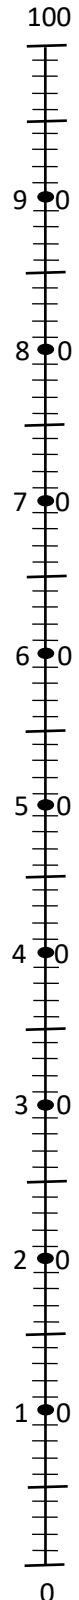

**SLECHTST**  
Voorstelbare  
gezondheidstoestand

→ French version

|                                                                                               |
|-----------------------------------------------------------------------------------------------|
| <ul style="list-style-type: none"> <li>• <b><u>La qualité de vie (EuroQoL)</u></b></li> </ul> |
|-----------------------------------------------------------------------------------------------|

Veillez indiquer, pour chacune des rubriques suivantes, l'affirmation qui décrit le mieux votre état de santé aujourd'hui, en entourant la chiffre appropriée.

|                                                                                             |   |
|---------------------------------------------------------------------------------------------|---|
| <b>Mobilité</b>                                                                             |   |
| Je n'ai aucun problème pour me déplacer à pied                                              | 1 |
| J'ai des problèmes pour me déplacer à pied                                                  | 2 |
| Je suis obligé(e) de rester alité(e)                                                        | 3 |
| <b>Autonomie de la personne</b>                                                             |   |
| Je n'ai aucun problème pour prendre soin de moi                                             | 1 |
| J'ai des problèmes pour m'habiller ou pour me laver tout(e) seul(e)                         | 2 |
| Je suis incapable de me laver ou de m'habiller tout(e) seul(e)                              | 3 |
| <b>Activités courantes (par ex. : travaux domestiques, activités familiales ou loisirs)</b> |   |
| Je n'ai aucun problème pour accomplir mes activités courantes                               | 1 |
| J'ai des problèmes pour accomplir mes activités courantes                                   | 2 |
| Je suis incapable d'accomplir mes activités courantes                                       | 3 |
| <b>Douleurs/gêne</b>                                                                        |   |
| Je n'ai ni douleurs, ni gêne                                                                | 1 |
| J'ai des douleurs ou une gêne modérée(s)                                                    | 2 |
| J'ai des douleurs ou une gêne extrême(s)                                                    | 3 |
| <b>Anxiété/dépression</b>                                                                   |   |
| Je ne suis ni anxieux(se), ni déprimé(e)                                                    | 1 |
| Je suis modérément anxieux(se) ou déprimé(e)                                                | 2 |
| Je suis extrêmement anxieux(se) ou déprimé(e)                                               | 3 |

Pour vous aider à indiquer dans quelle mesure tel ou tel état de santé est bon ou mauvais, nous avons tracé une échelle graduée (comme celle d'un thermomètre) sur laquelle 100 correspond au meilleur état de santé que vous puissiez imaginer et 0 au pire état de santé que vous puissiez imaginer.

Nous aimerions que vous indiquiez sur cette échelle graduée à quel endroit vous situez votre état de santé aujourd'hui. Pour cela, veuillez tracer une ligne sur l'échelle qui correspond à votre état de santé aujourd'hui.

MEILLEUR état  
de  
santé imaginable

100

90

80

70

60

50

40

30

20

10

0

PIRE état de  
santé imaginable

**Appendix 8. SAE Report Form****Report of serious adverse event (SAE)****1. Details of Chief Investigator**

|           |                                                                                           |
|-----------|-------------------------------------------------------------------------------------------|
| Name      | Dr. Philip Debruyne                                                                       |
| Address   | AZ Groeninge<br>Campus loofstraat – oncologisch centrum<br>Loofstraat 43, B-8500 KORTRIJK |
| Telephone | 056/ 63 39 00                                                                             |
| Email     | Philip.Debruyne@azgroeninge.be                                                            |
| Fax       | 056/ 63 39 09                                                                             |

**2. Details of the study**

|                                                                |                                                                                                                                                                                                                                          |
|----------------------------------------------------------------|------------------------------------------------------------------------------------------------------------------------------------------------------------------------------------------------------------------------------------------|
| Full title of the study                                        | A randomized wait-list controlled trial on the use of Emotional Freedom Techniques as an intervention strategy to reduce patient reported cognitive complaints in cancer survivors on behalf of the BSMO - Cancer Survivorship Taskforce |
| Name of main REC                                               | Commissie Medische Ethiek<br>UZ Brussel                                                                                                                                                                                                  |
| Main REC reference number                                      |                                                                                                                                                                                                                                          |
| Research sponsor                                               | Dhr. J. Deleu<br>(Chief executive officer, AZ Groeninge)                                                                                                                                                                                 |
| Sponsor's reference for this report:<br><i>(if applicable)</i> |                                                                                                                                                                                                                                          |

**3. Type of event**

*Please categorize this event, ticking all appropriate options:*

|                                                                             |                                                             |                                                                                      |
|-----------------------------------------------------------------------------|-------------------------------------------------------------|--------------------------------------------------------------------------------------|
| Death <input type="checkbox"/>                                              | Life threatening <input type="checkbox"/>                   | Hospitalisation or prolongation of existing hospitalisation <input type="checkbox"/> |
| Persistent or significant disability or incapacity <input type="checkbox"/> | Congenital anomaly or birth defect <input type="checkbox"/> | Other <input type="checkbox"/>                                                       |



**4. Circumstances of event – relation to study product**

|                                                                                                                                                                                                    |                                                                                                                                                                           |
|----------------------------------------------------------------------------------------------------------------------------------------------------------------------------------------------------|---------------------------------------------------------------------------------------------------------------------------------------------------------------------------|
| Date of SAE                                                                                                                                                                                        |                                                                                                                                                                           |
| Location                                                                                                                                                                                           |                                                                                                                                                                           |
| Describe the circumstances of the event<br>(attach copy of detailed report if necessary)<br><br><input type="checkbox"/> <i>primary report</i><br><input type="checkbox"/> <i>follow-up report</i> |                                                                                                                                                                           |
| Is SAE related to study product?                                                                                                                                                                   | <input type="checkbox"/> <i>not related</i> <input type="checkbox"/> <i>possible</i><br><input type="checkbox"/> <i>unlikely</i> <input type="checkbox"/> <i>probable</i> |
| Expected SAE                                                                                                                                                                                       | <input type="checkbox"/> <i>yes</i> <i>If yes, mention source:</i><br><input type="checkbox"/> <i>no</i>                                                                  |

**5. Declaration**

|                                 |  |
|---------------------------------|--|
| Signature of chief investigator |  |
| Print name                      |  |
| Date of submission              |  |

**6. Acknowledgement of receipt by main REC (please insert name)**

The [                      ] research ethics committee acknowledges receipt of the above.

|                 |  |
|-----------------|--|
| Signed          |  |
| Name            |  |
| Position on REC |  |
| Date            |  |
